# Supplementary material for: Urban forests sustain diverse carrion beetle assemblages in the New York City metropolitan area
Source: PeerJ. 2017 Mar 15;5:e3088. doi: 10.7717/peerj.3088 (PMC5356479; doi:10.7717/peerj.3088)
Supplement: Data S1 — This file includes a single entry for every individual carrion beetle collected during this study, including information on species, site (codes follow Table 1 in the manuscript), site coordinates, and Start and End dates of the surveys in which the beetle was collected. [file peerj-05-3088-s004.xlsx]

## Sheet: Sheet1
Sample #	Species	Site Code	Trap #	GPS Coordinates	Start-End Dates
15	O. noveboracense	LCC_Trial1	3	41.12822, -73.73229	6/22-6/29/15
16	N. orbicollis	LCC_Trial1	3	41.12822, -73.73229	6/22-6/29/15
17	O. noveboracense	LCC_Trial1	3	41.12822, -73.73229	6/22-6/29/15
18	N. tomentosus	LCC_Trial1	1	41.12547, -73.73148	6/22-6/29/15
19	O. noveboracense	LCC_Trial1	1	41.12547, -73.73148	6/22-6/29/15
20	O. noveboracense	LCC_Trial1	1	41.12547, -73.73148	6/22-6/29/15
21	N. orbicollis	LCC_Trial1	1	41.12547, -73.73148	6/22-6/29/15
22	N. tomentosus	LCC_Trial1	1	41.12547, -73.73148	6/22-6/29/15
23	N. orbicollis	LCC_Trial1	2	41.12987, -73.73183	6/22-6/29/15
24	N. tomentosus	LCC_Trial1	2	41.12987, -73.73183	6/22-6/29/15
25	N. orbicollis	LCC_Trial1	2	41.12987, -73.73183	6/22-6/29/15
26	N. tomentosus	LCC_Trial1	2	41.12987, -73.73183	6/22-6/29/15
27	O. noveboracense	LCC_Trial1	4	41.13003, -73.72993	6/22-6/29/15
28	N. tomentosus	LCC_Trial1	4	41.13003, -73.72993	6/22-6/29/15
29	N. tomentosus	LCC_Trial1	4	41.13003, -73.72993	6/22-6/29/15
30	O. noveboracense	LCC_Trial1	3	41.12822, -73.73229	6/22-6/29/15
31	O. noveboracense	LCC_Trial1	1	41.12547, -73.73148	6/22-6/29/15
32	N. orbicollis	LCC_Trial1	1	41.12547, -73.73148	6/22-6/29/15
33	O. noveboracense	LCC_Trial1	1	41.12547, -73.73148	6/22-6/29/15
34	N. tomentosus	LCC_Trial1	1	41.12547, -73.73148	6/22-6/29/15
35	O. noveboracense	LCC_Trial1	1	41.12547, -73.73148	6/22-6/29/15
36	O. noveboracense	LCC_Trial1	1	41.12547, -73.73148	6/22-6/29/15
37	O. noveboracense	LCC_Trial1	1	41.12547, -73.73148	6/22-6/29/15
38	N. orbicollis	LCC_Trial1	4	41.13003, -73.72993	6/22-6/29/15
39	N. orbicollis	LCC_Trial1	4	41.13003, -73.72993	6/22-6/29/15
40	N. orbicollis	LCC_Trial1	1	41.12547, -73.73148	6/22-6/29/15
41	O. noveboracense	LCC_Trial1	1	41.12547, -73.73148	6/22-6/29/15
42	N. tomentosus	LCC_Trial1	1	41.12547, -73.73148	6/22-6/29/15
43	O. noveboracense	LCC_Trial1	1	41.12547, -73.73148	6/22-6/29/15
44	N. tomentosus	LCC_Trial1	1	41.12547, -73.73148	6/22-6/29/15
45	O. noveboracense	LCC_Trial1	1	41.12547, -73.73148	6/22-6/29/15
46	N. orbicollis	LCC_Trial1	1	41.12547, -73.73148	6/22-6/29/15
47	N. orbicollis	LCC_Trial1	1	41.12547, -73.73148	6/22-6/29/15
48	N. tomentosus	LCC_Trial1	1	41.12547, -73.73148	6/22-6/29/15
49	N. orbicollis	LCC_Trial1	4	41.13003, -73.72993	6/22-6/29/15
50	N. tomentosus	LCC_Trial1	1	41.12547, -73.73148	6/22-6/29/15
51	N. orbicollis	IHP	1	40.872692, -73.92419	6/29-7/6/15
52	N. orbicollis	IHP	1	40.872692, -73.92419	6/29-7/6/15
53	N. orbicollis	IHP	1	40.872692, -73.92419	6/29-7/6/15
54	N. orbicollis	IHP	1	40.872692, -73.92419	6/29-7/6/15
55	N. orbicollis	IHP	1	40.872692, -73.92419	6/29-7/6/15
56	N. orbicollis	IHP	1	40.872692, -73.92419	6/29-7/6/15
57	N. tomentosus	IHP	1	40.872692, -73.92419	6/29-7/6/15
58	N. orbicollis	IHP	1	40.872692, -73.92419	6/29-7/6/15
59	N. orbicollis	IHP	1	40.872692, -73.92419	6/29-7/6/15
60	N. orbicollis	IHP	1	40.872692, -73.92419	6/29-7/6/15
61	N. orbicollis	IHP	1	40.872692, -73.92419	6/29-7/6/15
62	N. orbicollis	IHP	1	40.872692, -73.92419	6/29-7/6/15
63	N. orbicollis	IHP	1	40.872692, -73.92419	6/29-7/6/15
64	N. orbicollis	IHP	1	40.872692, -73.92419	6/29-7/6/15
65	N. orbicollis	IHP	1	40.872692, -73.92419	6/29-7/6/15
66	N. tomentosus	IHP	1	40.872692, -73.92419	6/29-7/6/15
67	N. tomentosus	IHP	1	40.872692, -73.92419	6/29-7/6/15
68	N. orbicollis	IHP	1	40.872692, -73.92419	6/29-7/6/15
69	N. orbicollis	IHP	1	40.872692, -73.92419	6/29-7/6/15
70	N. tomentosus	IHP	1	40.872692, -73.92419	6/29-7/6/15
71	N. orbicollis	IHP	1	40.872692, -73.92419	6/29-7/6/15
72	N. orbicollis	IHP	1	40.872692, -73.92419	6/29-7/6/15
73	N. tomentosus	IHP	1	40.872692, -73.92419	6/29-7/6/15
74	N. tomentosus	IHP	1	40.872692, -73.92419	6/29-7/6/15
75	N. orbicollis	IHP	1	40.872692, -73.92419	6/29-7/6/15
76	N. orbicollis	IHP	1	40.872692, -73.92419	6/29-7/6/15
77	N. tomentosus	IHP	1	40.872692, -73.92419	6/29-7/6/15
78	N. tomentosus	IHP	1	40.872692, -73.92419	6/29-7/6/15
79	N. defodiens	IHP	1	40.872692, -73.92419	6/29-7/6/15
80	N. orbicollis	IHP	1	40.872692, -73.92419	6/29-7/6/15
81	N. tomentosus	IHP	1	40.872692, -73.92419	6/29-7/6/15
82	O. noveboracense	IHP	1	40.872692, -73.92419	6/29-7/6/15
83	O. noveboracense	IHP	1	40.872692, -73.92419	6/29-7/6/15
84	N. orbicollis	IHP	1	40.872692, -73.92419	6/29-7/6/15
85	O. noveboracense	IHP	1	40.872692, -73.92419	6/29-7/6/15
86	N. tomentosus	IHP	1	40.872692, -73.92419	6/29-7/6/15
87	N. tomentosus	IHP	1	40.872692, -73.92419	6/29-7/6/15
88	N. orbicollis	IHP	1	40.872692, -73.92419	6/29-7/6/15
89	N. orbicollis	IHP	1	40.872692, -73.92419	6/29-7/6/15
90	N. orbicollis	IHP	1	40.872692, -73.92419	6/29-7/6/15
91	N. tomentosus	IHP	1	40.872692, -73.92419	6/29-7/6/15
92	N. orbicollis	IHP	1	40.872692, -73.92419	6/29-7/6/15
93	N. orbicollis	IHP	1	40.872692, -73.92419	6/29-7/6/15
94	N. orbicollis	IHP	1	40.872692, -73.92419	6/29-7/6/15
95	N. tomentosus	IHP	1	40.872692, -73.92419	6/29-7/6/15
96	N. orbicollis	IHP	1	40.872692, -73.92419	6/29-7/6/15
97	N. orbicollis	IHP	1	40.872692, -73.92419	6/29-7/6/15
98	N. orbicollis	IHP	1	40.872692, -73.92419	6/29-7/6/15
99	N. orbicollis	IHP	1	40.872692, -73.92419	6/29-7/6/15
100	N. orbicollis	IHP	1	40.872692, -73.92419	6/29-7/6/15
101	N. orbicollis	IHP	1	40.872692, -73.92419	6/29-7/6/15
102	N. orbicollis	IHP	1	40.872692, -73.92419	6/29-7/6/15
103	N. orbicollis	IHP	1	40.872692, -73.92419	6/29-7/6/15
104	N. tomentosus	IHP	1	40.872692, -73.92419	6/29-7/6/15
105	N. orbicollis	IHP	1	40.872692, -73.92419	6/29-7/6/15
106	N. orbicollis	IHP	1	40.872692, -73.92419	6/29-7/6/15
107	N. orbicollis	IHP	1	40.872692, -73.92419	6/29-7/6/15
108	N. orbicollis	IHP	1	40.872692, -73.92419	6/29-7/6/15
109	N. tomentosus	IHP	1	40.872692, -73.92419	6/29-7/6/15
110	N. tomentosus	IHP	1	40.872692, -73.92419	6/29-7/6/15
111	N. tomentosus	IHP	1	40.872692, -73.92419	6/29-7/6/15
112	N. tomentosus	IHP	1	40.872692, -73.92419	6/29-7/6/15
113	N. orbicollis	IHP	1	40.872692, -73.92419	6/29-7/6/15
114	N. orbicollis	IHP	1	40.872692, -73.92419	6/29-7/6/15
115	N. orbicollis	IHP	1	40.872692, -73.92419	6/29-7/6/15
116	N. orbicollis	IHP	1	40.872692, -73.92419	6/29-7/6/15
117	N. tomentosus	IHP	1	40.872692, -73.92419	6/29-7/6/15
118	N. tomentosus	IHP	1	40.872692, -73.92419	6/29-7/6/15
119	N. orbicollis	IHP	1	40.872692, -73.92419	6/29-7/6/15
120	N. orbicollis	IHP	1	40.872692, -73.92419	6/29-7/6/15
121	N. orbicollis	IHP	1	40.872692, -73.92419	6/29-7/6/15
122	N. orbicollis	IHP	1	40.872692, -73.92419	6/29-7/6/15
123	N. tomentosus	IHP	1	40.872692, -73.92419	6/29-7/6/15
124	N. tomentosus	IHP	1	40.872692, -73.92419	6/29-7/6/15
125	N. orbicollis	IHP	1	40.872692, -73.92419	6/29-7/6/15
126	N. orbicollis	IHP	1	40.872692, -73.92419	6/29-7/6/15
127	N. orbicollis	IHP	2	40.871934, -73.923383	6/29-7/6/15
128	N. tomentosus	IHP	2	40.871934, -73.923383	6/29-7/6/15
129	N. tomentosus	IHP	2	40.871934, -73.923383	6/29-7/6/15
130	N. tomentosus	IHP	2	40.871934, -73.923383	6/29-7/6/15
131	N. tomentosus	IHP	2	40.871934, -73.923383	6/29-7/6/15
132	N. tomentosus	IHP	2	40.871934, -73.923383	6/29-7/6/15
133	N. tomentosus	IHP	2	40.871934, -73.923383	6/29-7/6/15
134	N. tomentosus	IHP	2	40.871934, -73.923383	6/29-7/6/15
135	N. orbicollis	IHP	2	40.871934, -73.923383	6/29-7/6/15
136	N. orbicollis	IHP	2	40.871934, -73.923383	6/29-7/6/15
137	N. tomentosus	IHP	2	40.871934, -73.923383	6/29-7/6/15
138	N. tomentosus	IHP	2	40.871934, -73.923383	6/29-7/6/15
139	N. orbicollis	IHP	2	40.871934, -73.923383	6/29-7/6/15
140	N. tomentosus	IHP	2	40.871934, -73.923383	6/29-7/6/15
141	N. tomentosus	IHP	2	40.871934, -73.923383	6/29-7/6/15
142	N. orbicollis	IHP	2	40.871934, -73.923383	6/29-7/6/15
143	N. pustulatus	IHP	2	40.871934, -73.923383	6/29-7/6/15
144	N. tomentosus	IHP	2	40.871934, -73.923383	6/29-7/6/15
145	O. noveboracense	IHP	2	40.871934, -73.923383	6/29-7/6/15
146	N. tomentosus	IHP	2	40.871934, -73.923383	6/29-7/6/15
147	N. tomentosus	IHP	2	40.871934, -73.923383	6/29-7/6/15
148	O. noveboracense	IHP	2	40.871934, -73.923383	6/29-7/6/15
149	N. tomentosus	IHP	2	40.871934, -73.923383	6/29-7/6/15
150	N. orbicollis	IHP	2	40.871934, -73.923383	6/29-7/6/15
151	N. tomentosus	IHP	2	40.871934, -73.923383	6/29-7/6/15
152	N. tomentosus	IHP	2	40.871934, -73.923383	6/29-7/6/15
153	N. orbicollis	IHP	2	40.871934, -73.923383	6/29-7/6/15
154	N. tomentosus	IHP	2	40.871934, -73.923383	6/29-7/6/15
155	N. tomentosus	IHP	2	40.871934, -73.923383	6/29-7/6/15
156	N. tomentosus	IHP	2	40.871934, -73.923383	6/29-7/6/15
157	N. tomentosus	IHP	2	40.871934, -73.923383	6/29-7/6/15
158	N. tomentosus	IHP	2	40.871934, -73.923383	6/29-7/6/15
159	N. tomentosus	IHP	2	40.871934, -73.923383	6/29-7/6/15
160	N. tomentosus	IHP	2	40.871934, -73.923383	6/29-7/6/15
161	N. tomentosus	IHP	2	40.871934, -73.923383	6/29-7/6/15
162	N. tomentosus	IHP	2	40.871934, -73.923383	6/29-7/6/15
163	O. noveboracense	IHP	2	40.871934, -73.923383	6/29-7/6/15
164	N. tomentosus	IHP	3	40.869634, -73.922583	6/29-7/6/15
165	O. inequale	IHP	3	40.869634, -73.922583	6/29-7/6/15
166	N. tomentosus	IHP	3	40.869634, -73.922583	6/29-7/6/15
167	N. orbicollis	IHP	3	40.869634, -73.922583	6/29-7/6/15
168	O. noveboracense	IHP	3	40.869634, -73.922583	6/29-7/6/15
169	N. orbicollis	IHP	3	40.869634, -73.922583	6/29-7/6/15
170	N. tomentosus	IHP	3	40.869634, -73.922583	6/29-7/6/15
171	N. orbicollis	IHP	3	40.869634, -73.922583	6/29-7/6/15
172	N. tomentosus	IHP	3	40.869634, -73.922583	6/29-7/6/15
173	N. tomentosus	IHP	3	40.869634, -73.922583	6/29-7/6/15
174	N. orbicollis	IHP	3	40.869634, -73.922583	6/29-7/6/15
175	N. tomentosus	IHP	3	40.869634, -73.922583	6/29-7/6/15
176	N. tomentosus	IHP	3	40.869634, -73.922583	6/29-7/6/15
177	N. tomentosus	IHP	3	40.869634, -73.922583	6/29-7/6/15
178	N. tomentosus	IHP	3	40.869634, -73.922583	6/29-7/6/15
179	N. tomentosus	IHP	3	40.869634, -73.922583	6/29-7/6/15
180	N. tomentosus	IHP	3	40.869634, -73.922583	6/29-7/6/15
181	O. noveboracense	IHP	3	40.869634, -73.922583	6/29-7/6/15
182	O. noveboracense	IHP	3	40.869634, -73.922583	6/29-7/6/15
183	N. tomentosus	IHP	3	40.869634, -73.922583	6/29-7/6/15
184	N. tomentosus	IHP	3	40.869634, -73.922583	6/29-7/6/15
185	N. tomentosus	IHP	3	40.869634, -73.922583	6/29-7/6/15
186	O. noveboracense	IHP	3	40.869634, -73.922583	6/29-7/6/15
187	N. tomentosus	IHP	3	40.869634, -73.922583	6/29-7/6/15
188	O. noveboracense	IHP	3	40.869634, -73.922583	6/29-7/6/15
189	N. tomentosus	IHP	3	40.869634, -73.922583	6/29-7/6/15
190	N. tomentosus	IHP	3	40.869634, -73.922583	6/29-7/6/15
191	N. tomentosus	IHP	3	40.869634, -73.922583	6/29-7/6/15
192	O. noveboracense	IHP	3	40.869634, -73.922583	6/29-7/6/15
193	O. noveboracense	IHP	3	40.869634, -73.922583	6/29-7/6/15
194	N. tomentosus	IHP	3	40.869634, -73.922583	6/29-7/6/15
195	N. tomentosus	IHP	3	40.869634, -73.922583	6/29-7/6/15
196	O. noveboracense	IHP	3	40.869634, -73.922583	6/29-7/6/15
197	N. tomentosus	IHP	3	40.869634, -73.922583	6/29-7/6/15
198	N. tomentosus	IHP	3	40.869634, -73.922583	6/29-7/6/15
199	O. noveboracense	IHP	3	40.869634, -73.922583	6/29-7/6/15
200	O. noveboracense	IHP	3	40.869634, -73.922583	6/29-7/6/15
201	O. noveboracense	IHP	3	40.869634, -73.922583	6/29-7/6/15
202	O. noveboracense	IHP	3	40.869634, -73.922583	6/29-7/6/15
203	O. noveboracense	IHP	3	40.869634, -73.922583	6/29-7/6/15
204	O. noveboracense	IHP	3	40.869634, -73.922583	6/29-7/6/15
205	N. tomentosus	HBP	1	40.838597, -73.934947	6/29-7/6/15
206	N. tomentosus	HBP	1	40.838597, -73.934947	6/29-7/6/15
207	N. tomentosus	HBP	1	40.838597, -73.934947	6/29-7/6/15
208	N. tomentosus	HBP	1	40.838597, -73.934947	6/29-7/6/15
209	O. noveboracense	HBP	1	40.838597, -73.934947	6/29-7/6/15
210	N. tomentosus	HBP	1	40.838597, -73.934947	6/29-7/6/15
211	N. tomentosus	HBP	1	40.838597, -73.934947	6/29-7/6/15
212	O. inequale	HBP	1	40.838597, -73.934947	6/29-7/6/15
213	O. noveboracense	HBP	1	40.838597, -73.934947	6/29-7/6/15
214	N. tomentosus	HBP	2	40.838764, -73.934321	6/29-7/6/15
215	N. tomentosus	HBP	2	40.838764, -73.934321	6/29-7/6/15
216	O. noveboracense	HBP	2	40.838764, -73.934321	6/29-7/6/15
217	N. tomentosus	HBP	2	40.838764, -73.934321	6/29-7/6/15
218	N. tomentosus	HBP	2	40.838764, -73.934321	6/29-7/6/15
219	O. noveboracense	HBP	2	40.838764, -73.934321	6/29-7/6/15
220	N. tomentosus	HBP	2	40.838764, -73.934321	6/29-7/6/15
221	N. tomentosus	HBP	2	40.838764, -73.934321	6/29-7/6/15
222	O. noveboracense	HBP	2	40.838764, -73.934321	6/29-7/6/15
223	O. noveboracense	HBP	2	40.838764, -73.934321	6/29-7/6/15
224	O. noveboracense	HBP	2	40.838764, -73.934321	6/29-7/6/15
225	N. tomentosus	HBP	3	40.841182, -73.933393	6/29-7/6/15
226	N. tomentosus	HBP	3	40.841182, -73.933393	6/29-7/6/15
227	N. tomentosus	HBP	3	40.841182, -73.933393	6/29-7/6/15
228	N. tomentosus	HBP	3	40.841182, -73.933393	6/29-7/6/15
229	N. orbicollis	HBP	3	40.841182, -73.933393	6/29-7/6/15
230	N. tomentosus	HBP	3	40.841182, -73.933393	6/29-7/6/15
231	N. tomentosus	HBP	3	40.841182, -73.933393	6/29-7/6/15
232	N. tomentosus	HBP	3	40.841182, -73.933393	6/29-7/6/15
233	N. tomentosus	HBP	3	40.841182, -73.933393	6/29-7/6/15
234	N. tomentosus	HBP	3	40.841182, -73.933393	6/29-7/6/15
235	N. orbicollis	HBP	3	40.841182, -73.933393	6/29-7/6/15
236	N. tomentosus	HBP	3	40.841182, -73.933393	6/29-7/6/15
237	N. tomentosus	HBP	3	40.841182, -73.933393	6/29-7/6/15
238	N. tomentosus	HBP	3	40.841182, -73.933393	6/29-7/6/15
239	N. tomentosus	HBP	3	40.841182, -73.933393	6/29-7/6/15
240	N. orbicollis	HBP	3	40.841182, -73.933393	6/29-7/6/15
241	N. tomentosus	HBP	3	40.841182, -73.933393	6/29-7/6/15
242	N. tomentosus	HBP	3	40.841182, -73.933393	6/29-7/6/15
243	N. tomentosus	HBP	3	40.841182, -73.933393	6/29-7/6/15
244	N. tomentosus	CP	1	40.76672, -73.975225	6/29-7/6/15
245	O. noveboracense	CP	1	40.76672, -73.975225	6/29-7/6/15
246	N. tomentosus	CP	1	40.76672, -73.975225	6/29-7/6/15
247	O. noveboracense	CP	1	40.76672, -73.975225	6/29-7/6/15
248	O. noveboracense	CP	2	40.766122, -73.974594	6/29-7/6/15
249	O. noveboracense	CP	2	40.766122, -73.974594	6/29-7/6/15
250	O. noveboracense	CP	2	40.766122, -73.974594	6/29-7/6/15
251	N. tomentosus	CP	3	40.766807, -73.974885	6/29-7/6/15
252	N. tomentosus	CP	3	40.766807, -73.974885	6/29-7/6/15
253	N. tomentosus	CP	3	40.766807, -73.974885	6/29-7/6/15
254	O. noveboracense	CP	3	40.766807, -73.974885	6/29-7/6/15
255	O. noveboracense	CP	3	40.766807, -73.974885	6/29-7/6/15
256	N. tomentosus	CP	3	40.766807, -73.974885	6/29-7/6/15
257	O. noveboracense	CP	3	40.766807, -73.974885	6/29-7/6/15
258	O. noveboracense	CP	3	40.766807, -73.974885	6/29-7/6/15
259	O. noveboracense	CP	3	40.766807, -73.974885	6/29-7/6/15
260	O. noveboracense	CP	3	40.766807, -73.974885	6/29-7/6/15
261	O. noveboracense	CP	3	40.766807, -73.974885	6/29-7/6/15
262	O. noveboracense	CP	3	40.766807, -73.974885	6/29-7/6/15
263	O. noveboracense	CP	3	40.766807, -73.974885	6/29-7/6/15
264	O. noveboracense	CP	3	40.766807, -73.974885	6/29-7/6/15
265	O. noveboracense	CP	3	40.766807, -73.974885	6/29-7/6/15
266	O. noveboracense	CP	3	40.766807, -73.974885	6/29-7/6/15
267	O. noveboracense	CP	3	40.766807, -73.974885	6/29-7/6/15
268	O. noveboracense	CP	3	40.766807, -73.974885	6/29-7/6/15
269	N. tomentosus	SWP	1	40.97814, -73.74732	7/1-7/7/15
270	N. tomentosus	SWP	1	40.97814, -73.74732	7/1-7/7/15
271	N. tomentosus	SWP	1	40.97814, -73.74732	7/1-7/7/15
272	N. tomentosus	SWP	1	40.97814, -73.74732	7/1-7/7/15
273	N. tomentosus	SWP	1	40.97814, -73.74732	7/1-7/7/15
274	N. tomentosus	SWP	1	40.97814, -73.74732	7/1-7/7/15
275	N. tomentosus	SWP	1	40.97814, -73.74732	7/1-7/7/15
276	N. tomentosus	SWP	1	40.97814, -73.74732	7/1-7/7/15
277	N. tomentosus	SWP	1	40.97814, -73.74732	7/1-7/7/15
278	N. tomentosus	SWP	1	40.97814, -73.74732	7/1-7/7/15
279	N. tomentosus	SWP	1	40.97814, -73.74732	7/1-7/7/15
280	N. tomentosus	SWP	1	40.97814, -73.74732	7/1-7/7/15
281	N. tomentosus	SWP	1	40.97814, -73.74732	7/1-7/7/15
282	N. tomentosus	SWP	1	40.97814, -73.74732	7/1-7/7/15
283	N. tomentosus	SWP	1	40.97814, -73.74732	7/1-7/7/15
284	N. tomentosus	SWP	1	40.97814, -73.74732	7/1-7/7/15
285	N. tomentosus	SWP	1	40.97814, -73.74732	7/1-7/7/15
286	N. tomentosus	SWP	1	40.97814, -73.74732	7/1-7/7/15
287	N. tomentosus	SWP	1	40.97814, -73.74732	7/1-7/7/15
288	N. tomentosus	SWP	1	40.97814, -73.74732	7/1-7/7/15
289	N. tomentosus	SWP	1	40.97814, -73.74732	7/1-7/7/15
290	N. orbicollis	SWP	1	40.97814, -73.74732	7/1-7/7/15
291	N. orbicollis	SWP	1	40.97814, -73.74732	7/1-7/7/15
292	O. noveboracense	SWP	1	40.97814, -73.74732	7/1-7/7/15
293	O. noveboracense	SWP	1	40.97814, -73.74732	7/1-7/7/15
294	O. noveboracense	SWP	1	40.97814, -73.74732	7/1-7/7/15
295	O. noveboracense	SWP	1	40.97814, -73.74732	7/1-7/7/15
296	O. noveboracense	SWP	1	40.97814, -73.74732	7/1-7/7/15
297	O. noveboracense	SWP	1	40.97814, -73.74732	7/1-7/7/15
298	O. noveboracense	SWP	1	40.97814, -73.74732	7/1-7/7/15
299	O. noveboracense	SWP	1	40.97814, -73.74732	7/1-7/7/15
300	O. noveboracense	SWP	1	40.97814, -73.74732	7/1-7/7/15
301	O. noveboracense	SWP	1	40.97814, -73.74732	7/1-7/7/15
302	O. noveboracense	SWP	1	40.97814, -73.74732	7/1-7/7/15
303	O. noveboracense	SWP	1	40.97814, -73.74732	7/1-7/7/15
304	O. noveboracense	SWP	1	40.97814, -73.74732	7/1-7/7/15
305	O. noveboracense	SWP	1	40.97814, -73.74732	7/1-7/7/15
306	O. noveboracense	SWP	1	40.97814, -73.74732	7/1-7/7/15
307	O. noveboracense	SWP	1	40.97814, -73.74732	7/1-7/7/15
308	O. noveboracense	SWP	1	40.97814, -73.74732	7/1-7/7/15
309	O. noveboracense	SWP	1	40.97814, -73.74732	7/1-7/7/15
310	O. noveboracense	SWP	1	40.97814, -73.74732	7/1-7/7/15
311	O. noveboracense	SWP	1	40.97814, -73.74732	7/1-7/7/15
312	O. noveboracense	SWP	1	40.97814, -73.74732	7/1-7/7/15
313	O. noveboracense	SWP	1	40.97814, -73.74732	7/1-7/7/15
314	O. noveboracense	SWP	1	40.97814, -73.74732	7/1-7/7/15
315	O. noveboracense	SWP	1	40.97814, -73.74732	7/1-7/7/15
316	O. noveboracense	SWP	1	40.97814, -73.74732	7/1-7/7/15
317	O. noveboracense	SWP	1	40.97814, -73.74732	7/1-7/7/15
318	O. noveboracense	SWP	1	40.97814, -73.74732	7/1-7/7/15
319	O. noveboracense	SWP	1	40.97814, -73.74732	7/1-7/7/15
320	O. noveboracense	SWP	1	40.97814, -73.74732	7/1-7/7/15
321	O. noveboracense	SWP	1	40.97814, -73.74732	7/1-7/7/15
322	O. noveboracense	SWP	1	40.97814, -73.74732	7/1-7/7/15
323	O. noveboracense	SWP	1	40.97814, -73.74732	7/1-7/7/15
324	O. noveboracense	SWP	1	40.97814, -73.74732	7/1-7/7/15
325	O. noveboracense	SWP	1	40.97814, -73.74732	7/1-7/7/15
326	O. noveboracense	SWP	1	40.97814, -73.74732	7/1-7/7/15
327	O. noveboracense	SWP	1	40.97814, -73.74732	7/1-7/7/15
328	O. noveboracense	SWP	1	40.97814, -73.74732	7/1-7/7/15
329	O. noveboracense	SWP	1	40.97814, -73.74732	7/1-7/7/15
330	O. noveboracense	SWP	1	40.97814, -73.74732	7/1-7/7/15
331	O. noveboracense	SWP	1	40.97814, -73.74732	7/1-7/7/15
332	N. tomentosus	SWP	2	40.97884, -73.74727	7/1-7/7/15
333	N. tomentosus	SWP	2	40.97884, -73.74727	7/1-7/7/15
334	N. tomentosus	SWP	2	40.97884, -73.74727	7/1-7/7/15
335	N. tomentosus	SWP	2	40.97884, -73.74727	7/1-7/7/15
336	N. tomentosus	SWP	2	40.97884, -73.74727	7/1-7/7/15
337	N. tomentosus	SWP	2	40.97884, -73.74727	7/1-7/7/15
338	N. tomentosus	SWP	2	40.97884, -73.74727	7/1-7/7/15
339	N. tomentosus	SWP	2	40.97884, -73.74727	7/1-7/7/15
340	N. tomentosus	SWP	2	40.97884, -73.74727	7/1-7/7/15
341	N. tomentosus	SWP	2	40.97884, -73.74727	7/1-7/7/15
342	N. tomentosus	SWP	2	40.97884, -73.74727	7/1-7/7/15
343	N. tomentosus	SWP	2	40.97884, -73.74727	7/1-7/7/15
344	N. tomentosus	SWP	2	40.97884, -73.74727	7/1-7/7/15
345	N. tomentosus	SWP	2	40.97884, -73.74727	7/1-7/7/15
346	N. tomentosus	SWP	2	40.97884, -73.74727	7/1-7/7/15
347	N. tomentosus	SWP	2	40.97884, -73.74727	7/1-7/7/15
348	N. tomentosus	SWP	2	40.97884, -73.74727	7/1-7/7/15
349	N. tomentosus	SWP	2	40.97884, -73.74727	7/1-7/7/15
350	N. tomentosus	SWP	2	40.97884, -73.74727	7/1-7/7/15
351	N. tomentosus	SWP	2	40.97884, -73.74727	7/1-7/7/15
352	N. tomentosus	SWP	2	40.97884, -73.74727	7/1-7/7/15
353	N. tomentosus	SWP	2	40.97884, -73.74727	7/1-7/7/15
354	O. noveboracense	SWP	2	40.97884, -73.74727	7/1-7/7/15
355	O. noveboracense	SWP	2	40.97884, -73.74727	7/1-7/7/15
356	O. noveboracense	SWP	2	40.97884, -73.74727	7/1-7/7/15
357	O. noveboracense	SWP	2	40.97884, -73.74727	7/1-7/7/15
358	O. noveboracense	SWP	2	40.97884, -73.74727	7/1-7/7/15
359	O. noveboracense	SWP	2	40.97884, -73.74727	7/1-7/7/15
360	O. noveboracense	SWP	2	40.97884, -73.74727	7/1-7/7/15
361	O. noveboracense	SWP	2	40.97884, -73.74727	7/1-7/7/15
362	O. noveboracense	SWP	2	40.97884, -73.74727	7/1-7/7/15
363	O. noveboracense	SWP	2	40.97884, -73.74727	7/1-7/7/15
364	O. noveboracense	SWP	2	40.97884, -73.74727	7/1-7/7/15
365	O. noveboracense	SWP	2	40.97884, -73.74727	7/1-7/7/15
366	O. noveboracense	SWP	2	40.97884, -73.74727	7/1-7/7/15
367	O. noveboracense	SWP	2	40.97884, -73.74727	7/1-7/7/15
368	O. noveboracense	SWP	2	40.97884, -73.74727	7/1-7/7/15
369	O. noveboracense	SWP	2	40.97884, -73.74727	7/1-7/7/15
370	O. noveboracense	SWP	2	40.97884, -73.74727	7/1-7/7/15
371	O. noveboracense	SWP	2	40.97884, -73.74727	7/1-7/7/15
372	O. noveboracense	SWP	2	40.97884, -73.74727	7/1-7/7/15
373	O. noveboracense	SWP	2	40.97884, -73.74727	7/1-7/7/15
374	O. noveboracense	SWP	2	40.97884, -73.74727	7/1-7/7/15
375	O. noveboracense	SWP	2	40.97884, -73.74727	7/1-7/7/15
376	O. noveboracense	SWP	2	40.97884, -73.74727	7/1-7/7/15
377	O. noveboracense	SWP	2	40.97884, -73.74727	7/1-7/7/15
378	O. noveboracense	SWP	2	40.97884, -73.74727	7/1-7/7/15
379	O. noveboracense	SWP	2	40.97884, -73.74727	7/1-7/7/15
380	O. noveboracense	SWP	2	40.97884, -73.74727	7/1-7/7/15
381	O. noveboracense	SWP	2	40.97884, -73.74727	7/1-7/7/15
382	O. noveboracense	SWP	2	40.97884, -73.74727	7/1-7/7/15
383	O. noveboracense	SWP	2	40.97884, -73.74727	7/1-7/7/15
384	O. noveboracense	SWP	2	40.97884, -73.74727	7/1-7/7/15
385	O. noveboracense	SWP	2	40.97884, -73.74727	7/1-7/7/15
386	N. pustulatus	SWP	2	40.97884, -73.74727	7/1-7/7/15
387	N. pustulatus	SWP	2	40.97884, -73.74727	7/1-7/7/15
388	N. pustulatus	SWP	2	40.97884, -73.74727	7/1-7/7/15
389	N. orbicollis	SWP	2	40.97884, -73.74727	7/1-7/7/15
390	N. orbicollis	SWP	2	40.97884, -73.74727	7/1-7/7/15
391	N. pustulatus	SWP	2	40.97884, -73.74727	7/1-7/7/15
392	N. orbicollis	SWP	2	40.97884, -73.74727	7/1-7/7/15
393	N. tomentosus	SWP	3	40.98050, -73.74612	7/1-7/7/15
394	N. tomentosus	SWP	3	40.98050, -73.74612	7/1-7/7/15
395	N. tomentosus	SWP	3	40.98050, -73.74612	7/1-7/7/15
396	N. tomentosus	SWP	3	40.98050, -73.74612	7/1-7/7/15
397	N. tomentosus	SWP	3	40.98050, -73.74612	7/1-7/7/15
398	N. tomentosus	SWP	3	40.98050, -73.74612	7/1-7/7/15
399	N. tomentosus	SWP	3	40.98050, -73.74612	7/1-7/7/15
400	N. tomentosus	SWP	3	40.98050, -73.74612	7/1-7/7/15
401	N. tomentosus	SWP	3	40.98050, -73.74612	7/1-7/7/15
402	N. tomentosus	SWP	3	40.98050, -73.74612	7/1-7/7/15
403	N. tomentosus	SWP	3	40.98050, -73.74612	7/1-7/7/15
404	N. tomentosus	SWP	3	40.98050, -73.74612	7/1-7/7/15
405	N. tomentosus	SWP	3	40.98050, -73.74612	7/1-7/7/15
406	N. tomentosus	SWP	3	40.98050, -73.74612	7/1-7/7/15
407	N. tomentosus	SWP	3	40.98050, -73.74612	7/1-7/7/15
408	N. tomentosus	SWP	3	40.98050, -73.74612	7/1-7/7/15
409	N. tomentosus	SWP	3	40.98050, -73.74612	7/1-7/7/15
410	N. tomentosus	SWP	3	40.98050, -73.74612	7/1-7/7/15
411	N. tomentosus	SWP	3	40.98050, -73.74612	7/1-7/7/15
412	N. tomentosus	SWP	3	40.98050, -73.74612	7/1-7/7/15
413	N. tomentosus	SWP	3	40.98050, -73.74612	7/1-7/7/15
414	N. tomentosus	SWP	3	40.98050, -73.74612	7/1-7/7/15
415	N. tomentosus	SWP	3	40.98050, -73.74612	7/1-7/7/15
416	N. tomentosus	SWP	3	40.98050, -73.74612	7/1-7/7/15
417	N. tomentosus	SWP	3	40.98050, -73.74612	7/1-7/7/15
418	N. tomentosus	SWP	3	40.98050, -73.74612	7/1-7/7/15
419	N. tomentosus	SWP	3	40.98050, -73.74612	7/1-7/7/15
420	N. tomentosus	SWP	3	40.98050, -73.74612	7/1-7/7/15
421	N. tomentosus	SWP	3	40.98050, -73.74612	7/1-7/7/15
422	N. tomentosus	SWP	3	40.98050, -73.74612	7/1-7/7/15
423	N. tomentosus	SWP	3	40.98050, -73.74612	7/1-7/7/15
424	N. tomentosus	SWP	3	40.98050, -73.74612	7/1-7/7/15
425	N. tomentosus	SWP	3	40.98050, -73.74612	7/1-7/7/15
426	N. tomentosus	SWP	3	40.98050, -73.74612	7/1-7/7/15
427	N. tomentosus	SWP	3	40.98050, -73.74612	7/1-7/7/15
428	N. tomentosus	SWP	3	40.98050, -73.74612	7/1-7/7/15
429	N. tomentosus	SWP	3	40.98050, -73.74612	7/1-7/7/15
430	N. tomentosus	SWP	3	40.98050, -73.74612	7/1-7/7/15
431	N. tomentosus	SWP	3	40.98050, -73.74612	7/1-7/7/15
432	N. tomentosus	SWP	3	40.98050, -73.74612	7/1-7/7/15
433	N. tomentosus	SWP	3	40.98050, -73.74612	7/1-7/7/15
434	N. tomentosus	SWP	3	40.98050, -73.74612	7/1-7/7/15
435	N. tomentosus	SWP	3	40.98050, -73.74612	7/1-7/7/15
436	N. tomentosus	SWP	3	40.98050, -73.74612	7/1-7/7/15
437	O. inequale	SWP	3	40.98050, -73.74612	7/1-7/7/15
438	N. orbicollis	SWP	3	40.98050, -73.74612	7/1-7/7/15
439	N. orbicollis	SWP	3	40.98050, -73.74612	7/1-7/7/15
440	N. pustulatus	SWP	3	40.98050, -73.74612	7/1-7/7/15
441	N. pustulatus	SWP	3	40.98050, -73.74612	7/1-7/7/15
442	N. pustulatus	SWP	3	40.98050, -73.74612	7/1-7/7/15
443	N. pustulatus	SWP	3	40.98050, -73.74612	7/1-7/7/15
444	N. pustulatus	SWP	3	40.98050, -73.74612	7/1-7/7/15
445	N. pustulatus	SWP	3	40.98050, -73.74612	7/1-7/7/15
446	N. pustulatus	SWP	3	40.98050, -73.74612	7/1-7/7/15
447	N. pustulatus	SWP	3	40.98050, -73.74612	7/1-7/7/15
448	N. pustulatus	SWP	3	40.98050, -73.74612	7/1-7/7/15
449	N. pustulatus	SWP	3	40.98050, -73.74612	7/1-7/7/15
450	N. pustulatus	SWP	3	40.98050, -73.74612	7/1-7/7/15
451	O. noveboracense	SWP	3	40.98050, -73.74612	7/1-7/7/15
452	O. noveboracense	SWP	3	40.98050, -73.74612	7/1-7/7/15
453	O. noveboracense	SWP	3	40.98050, -73.74612	7/1-7/7/15
454	O. noveboracense	SWP	3	40.98050, -73.74612	7/1-7/7/15
455	O. noveboracense	SWP	3	40.98050, -73.74612	7/1-7/7/15
456	O. noveboracense	SWP	3	40.98050, -73.74612	7/1-7/7/15
457	O. noveboracense	SWP	3	40.98050, -73.74612	7/1-7/7/15
458	O. noveboracense	SWP	3	40.98050, -73.74612	7/1-7/7/15
459	O. noveboracense	SWP	3	40.98050, -73.74612	7/1-7/7/15
460	O. noveboracense	SWP	3	40.98050, -73.74612	7/1-7/7/15
461	O. noveboracense	SWP	3	40.98050, -73.74612	7/1-7/7/15
462	O. noveboracense	SWP	3	40.98050, -73.74612	7/1-7/7/15
463	O. noveboracense	SWP	3	40.98050, -73.74612	7/1-7/7/15
464	O. noveboracense	SWP	3	40.98050, -73.74612	7/1-7/7/15
465	O. noveboracense	SWP	3	40.98050, -73.74612	7/1-7/7/15
466	O. noveboracense	SWP	3	40.98050, -73.74612	7/1-7/7/15
467	O. noveboracense	SWP	3	40.98050, -73.74612	7/1-7/7/15
468	O. noveboracense	SWP	3	40.98050, -73.74612	7/1-7/7/15
469	O. noveboracense	SWP	3	40.98050, -73.74612	7/1-7/7/15
470	O. noveboracense	SWP	3	40.98050, -73.74612	7/1-7/7/15
471	O. noveboracense	SWP	3	40.98050, -73.74612	7/1-7/7/15
472	O. noveboracense	SWP	3	40.98050, -73.74612	7/1-7/7/15
473	O. noveboracense	SWP	3	40.98050, -73.74612	7/1-7/7/15
474	O. noveboracense	SWP	3	40.98050, -73.74612	7/1-7/7/15
475	O. noveboracense	SWP	3	40.98050, -73.74612	7/1-7/7/15
476	O. noveboracense	SWP	3	40.98050, -73.74612	7/1-7/7/15
477	O. noveboracense	SWP	3	40.98050, -73.74612	7/1-7/7/15
478	O. noveboracense	SWP	3	40.98050, -73.74612	7/1-7/7/15
479	O. noveboracense	SWP	3	40.98050, -73.74612	7/1-7/7/15
480	O. noveboracense	SWP	3	40.98050, -73.74612	7/1-7/7/15
481	O. noveboracense	SWP	3	40.98050, -73.74612	7/1-7/7/15
482	O. noveboracense	SWP	3	40.98050, -73.74612	7/1-7/7/15
483	O. noveboracense	SWP	3	40.98050, -73.74612	7/1-7/7/15
484	O. noveboracense	SWP	3	40.98050, -73.74612	7/1-7/7/15
485	O. noveboracense	SWP	3	40.98050, -73.74612	7/1-7/7/15
486	O. noveboracense	SWP	3	40.98050, -73.74612	7/1-7/7/15
487	O. noveboracense	SWP	3	40.98050, -73.74612	7/1-7/7/15
488	O. noveboracense	SWP	3	40.98050, -73.74612	7/1-7/7/15
489	O. noveboracense	SWP	3	40.98050, -73.74612	7/1-7/7/15
490	O. noveboracense	SWP	3	40.98050, -73.74612	7/1-7/7/15
491	O. noveboracense	SWP	3	40.98050, -73.74612	7/1-7/7/15
492	O. noveboracense	SWP	3	40.98050, -73.74612	7/1-7/7/15
493	O. noveboracense	SWP	3	40.98050, -73.74612	7/1-7/7/15
494	O. noveboracense	SWP	3	40.98050, -73.74612	7/1-7/7/15
495	O. noveboracense	SWP	3	40.98050, -73.74612	7/1-7/7/15
496	O. noveboracense	SWP	3	40.98050, -73.74612	7/1-7/7/15
497	O. noveboracense	SWP	3	40.98050, -73.74612	7/1-7/7/15
498	O. noveboracense	SWP	3	40.98050, -73.74612	7/1-7/7/15
499	O. noveboracense	SWP	3	40.98050, -73.74612	7/1-7/7/15
500	O. noveboracense	SWP	3	40.98050, -73.74612	7/1-7/7/15
501	O. noveboracense	SWP	3	40.98050, -73.74612	7/1-7/7/15
502	O. noveboracense	SWP	3	40.98050, -73.74612	7/1-7/7/15
503	O. noveboracense	SWP	3	40.98050, -73.74612	7/1-7/7/15
504	N. tomentosus	MRG	1	41.18393, -73.62124	7/1-7/7/15
505	N. tomentosus	MRG	1	41.18393, -73.62124	7/1-7/7/15
506	N. tomentosus	MRG	1	41.18393, -73.62124	7/1-7/7/15
507	N. tomentosus	MRG	1	41.18393, -73.62124	7/1-7/7/15
508	N. tomentosus	MRG	1	41.18393, -73.62124	7/1-7/7/15
509	N. tomentosus	MRG	1	41.18393, -73.62124	7/1-7/7/15
510	N. tomentosus	MRG	1	41.18393, -73.62124	7/1-7/7/15
511	N. tomentosus	MRG	1	41.18393, -73.62124	7/1-7/7/15
512	N. tomentosus	MRG	1	41.18393, -73.62124	7/1-7/7/15
513	N. tomentosus	MRG	1	41.18393, -73.62124	7/1-7/7/15
514	N. tomentosus	MRG	1	41.18393, -73.62124	7/1-7/7/15
515	N. tomentosus	MRG	1	41.18393, -73.62124	7/1-7/7/15
516	N. tomentosus	MRG	1	41.18393, -73.62124	7/1-7/7/15
517	N. tomentosus	MRG	1	41.18393, -73.62124	7/1-7/7/15
518	N. tomentosus	MRG	1	41.18393, -73.62124	7/1-7/7/15
519	N. tomentosus	MRG	1	41.18393, -73.62124	7/1-7/7/15
520	N. tomentosus	MRG	1	41.18393, -73.62124	7/1-7/7/15
521	N. tomentosus	MRG	1	41.18393, -73.62124	7/1-7/7/15
522	N. tomentosus	MRG	1	41.18393, -73.62124	7/1-7/7/15
523	N. tomentosus	MRG	1	41.18393, -73.62124	7/1-7/7/15
524	N. tomentosus	MRG	1	41.18393, -73.62124	7/1-7/7/15
525	N. tomentosus	MRG	1	41.18393, -73.62124	7/1-7/7/15
526	N. tomentosus	MRG	1	41.18393, -73.62124	7/1-7/7/15
527	N. tomentosus	MRG	1	41.18393, -73.62124	7/1-7/7/15
528	N. tomentosus	MRG	1	41.18393, -73.62124	7/1-7/7/15
529	N. tomentosus	MRG	1	41.18393, -73.62124	7/1-7/7/15
530	O. noveboracense	MRG	1	41.18393, -73.62124	7/1-7/7/15
531	O. noveboracense	MRG	1	41.18393, -73.62124	7/1-7/7/15
532	O. noveboracense	MRG	1	41.18393, -73.62124	7/1-7/7/15
533	O. noveboracense	MRG	1	41.18393, -73.62124	7/1-7/7/15
534	O. noveboracense	MRG	1	41.18393, -73.62124	7/1-7/7/15
535	O. noveboracense	MRG	1	41.18393, -73.62124	7/1-7/7/15
536	O. noveboracense	MRG	1	41.18393, -73.62124	7/1-7/7/15
537	O. noveboracense	MRG	1	41.18393, -73.62124	7/1-7/7/15
538	O. noveboracense	MRG	1	41.18393, -73.62124	7/1-7/7/15
539	O. noveboracense	MRG	1	41.18393, -73.62124	7/1-7/7/15
540	O. noveboracense	MRG	1	41.18393, -73.62124	7/1-7/7/15
541	O. noveboracense	MRG	1	41.18393, -73.62124	7/1-7/7/15
542	O. noveboracense	MRG	1	41.18393, -73.62124	7/1-7/7/15
543	O. noveboracense	MRG	1	41.18393, -73.62124	7/1-7/7/15
544	O. noveboracense	MRG	1	41.18393, -73.62124	7/1-7/7/15
545	O. noveboracense	MRG	1	41.18393, -73.62124	7/1-7/7/15
546	O. noveboracense	MRG	1	41.18393, -73.62124	7/1-7/7/15
547	O. noveboracense	MRG	1	41.18393, -73.62124	7/1-7/7/15
548	O. noveboracense	MRG	1	41.18393, -73.62124	7/1-7/7/15
549	O. noveboracense	MRG	1	41.18393, -73.62124	7/1-7/7/15
550	O. noveboracense	MRG	1	41.18393, -73.62124	7/1-7/7/15
551	O. noveboracense	MRG	1	41.18393, -73.62124	7/1-7/7/15
552	O. noveboracense	MRG	1	41.18393, -73.62124	7/1-7/7/15
553	O. noveboracense	MRG	1	41.18393, -73.62124	7/1-7/7/15
554	O. noveboracense	MRG	1	41.18393, -73.62124	7/1-7/7/15
555	O. noveboracense	MRG	1	41.18393, -73.62124	7/1-7/7/15
556	O. noveboracense	MRG	1	41.18393, -73.62124	7/1-7/7/15
557	O. noveboracense	MRG	1	41.18393, -73.62124	7/1-7/7/15
558	N. orbicollis	MRG	1	41.18393, -73.62124	7/1-7/7/15
559	N. orbicollis	MRG	1	41.18393, -73.62124	7/1-7/7/15
560	N. orbicollis	MRG	1	41.18393, -73.62124	7/1-7/7/15
561	N. orbicollis	MRG	1	41.18393, -73.62124	7/1-7/7/15
562	N. tomentosus	MRG	2	41.18131, -73.62208	7/1-7/7/15
563	N. tomentosus	MRG	2	41.18131, -73.62208	7/1-7/7/15
564	N. tomentosus	MRG	2	41.18131, -73.62208	7/1-7/7/15
565	N. tomentosus	MRG	2	41.18131, -73.62208	7/1-7/7/15
566	N. tomentosus	MRG	2	41.18131, -73.62208	7/1-7/7/15
567	N. tomentosus	MRG	2	41.18131, -73.62208	7/1-7/7/15
568	N. tomentosus	MRG	2	41.18131, -73.62208	7/1-7/7/15
569	N. tomentosus	MRG	2	41.18131, -73.62208	7/1-7/7/15
570	N. tomentosus	MRG	2	41.18131, -73.62208	7/1-7/7/15
571	N. tomentosus	MRG	2	41.18131, -73.62208	7/1-7/7/15
572	N. tomentosus	MRG	2	41.18131, -73.62208	7/1-7/7/15
573	N. tomentosus	MRG	2	41.18131, -73.62208	7/1-7/7/15
574	N. tomentosus	MRG	2	41.18131, -73.62208	7/1-7/7/15
575	N. tomentosus	MRG	2	41.18131, -73.62208	7/1-7/7/15
576	N. tomentosus	MRG	2	41.18131, -73.62208	7/1-7/7/15
577	N. tomentosus	MRG	2	41.18131, -73.62208	7/1-7/7/15
578	N. tomentosus	MRG	2	41.18131, -73.62208	7/1-7/7/15
579	N. tomentosus	MRG	2	41.18131, -73.62208	7/1-7/7/15
580	N. tomentosus	MRG	2	41.18131, -73.62208	7/1-7/7/15
581	N. tomentosus	MRG	2	41.18131, -73.62208	7/1-7/7/15
582	N. tomentosus	MRG	2	41.18131, -73.62208	7/1-7/7/15
583	N. orbicollis	MRG	2	41.18131, -73.62208	7/1-7/7/15
584	N. orbicollis	MRG	2	41.18131, -73.62208	7/1-7/7/15
585	N. orbicollis	MRG	2	41.18131, -73.62208	7/1-7/7/15
586	N. orbicollis	MRG	2	41.18131, -73.62208	7/1-7/7/15
587	N. orbicollis	MRG	2	41.18131, -73.62208	7/1-7/7/15
588	N. orbicollis	MRG	2	41.18131, -73.62208	7/1-7/7/15
589	N. orbicollis	MRG	2	41.18131, -73.62208	7/1-7/7/15
590	N. orbicollis	MRG	2	41.18131, -73.62208	7/1-7/7/15
591	O. noveboracense	MRG	2	41.18131, -73.62208	7/1-7/7/15
592	O. noveboracense	MRG	2	41.18131, -73.62208	7/1-7/7/15
593	O. noveboracense	MRG	2	41.18131, -73.62208	7/1-7/7/15
594	O. noveboracense	MRG	2	41.18131, -73.62208	7/1-7/7/15
595	O. noveboracense	MRG	2	41.18131, -73.62208	7/1-7/7/15
596	O. noveboracense	MRG	2	41.18131, -73.62208	7/1-7/7/15
597	O. noveboracense	MRG	2	41.18131, -73.62208	7/1-7/7/15
598	O. noveboracense	MRG	2	41.18131, -73.62208	7/1-7/7/15
599	O. noveboracense	MRG	2	41.18131, -73.62208	7/1-7/7/15
600	O. noveboracense	MRG	2	41.18131, -73.62208	7/1-7/7/15
601	N. tomentosus	MRG	3	41.18107, -73.62080	7/1-7/7/15
602	N. tomentosus	MRG	3	41.18107, -73.62080	7/1-7/7/15
603	N. tomentosus	MRG	3	41.18107, -73.62080	7/1-7/7/15
604	N. tomentosus	MRG	3	41.18107, -73.62080	7/1-7/7/15
605	N. tomentosus	MRG	3	41.18107, -73.62080	7/1-7/7/15
606	N. tomentosus	MRG	3	41.18107, -73.62080	7/1-7/7/15
607	N. tomentosus	MRG	3	41.18107, -73.62080	7/1-7/7/15
608	N. tomentosus	MRG	3	41.18107, -73.62080	7/1-7/7/15
609	N. tomentosus	MRG	3	41.18107, -73.62080	7/1-7/7/15
610	N. tomentosus	MRG	3	41.18107, -73.62080	7/1-7/7/15
611	N. tomentosus	MRG	3	41.18107, -73.62080	7/1-7/7/15
612	N. tomentosus	MRG	3	41.18107, -73.62080	7/1-7/7/15
613	N. tomentosus	MRG	3	41.18107, -73.62080	7/1-7/7/15
614	N. tomentosus	MRG	3	41.18107, -73.62080	7/1-7/7/15
615	N. tomentosus	MRG	3	41.18107, -73.62080	7/1-7/7/15
616	N. tomentosus	MRG	3	41.18107, -73.62080	7/1-7/7/15
617	N. tomentosus	MRG	3	41.18107, -73.62080	7/1-7/7/15
618	N. tomentosus	MRG	3	41.18107, -73.62080	7/1-7/7/15
619	N. tomentosus	MRG	3	41.18107, -73.62080	7/1-7/7/15
620	N. tomentosus	MRG	3	41.18107, -73.62080	7/1-7/7/15
621	N. tomentosus	MRG	3	41.18107, -73.62080	7/1-7/7/15
622	N. tomentosus	MRG	3	41.18107, -73.62080	7/1-7/7/15
623	N. tomentosus	MRG	3	41.18107, -73.62080	7/1-7/7/15
624	N. tomentosus	MRG	3	41.18107, -73.62080	7/1-7/7/15
625	N. tomentosus	MRG	3	41.18107, -73.62080	7/1-7/7/15
626	N. tomentosus	MRG	3	41.18107, -73.62080	7/1-7/7/15
627	N. tomentosus	MRG	3	41.18107, -73.62080	7/1-7/7/15
628	N. tomentosus	MRG	3	41.18107, -73.62080	7/1-7/7/15
629	N. tomentosus	MRG	3	41.18107, -73.62080	7/1-7/7/15
630	N. tomentosus	MRG	3	41.18107, -73.62080	7/1-7/7/15
631	N. tomentosus	MRG	3	41.18107, -73.62080	7/1-7/7/15
632	N. tomentosus	MRG	3	41.18107, -73.62080	7/1-7/7/15
633	N. tomentosus	MRG	3	41.18107, -73.62080	7/1-7/7/15
634	N. tomentosus	MRG	3	41.18107, -73.62080	7/1-7/7/15
635	N. tomentosus	MRG	3	41.18107, -73.62080	7/1-7/7/15
636	N. tomentosus	MRG	3	41.18107, -73.62080	7/1-7/7/15
637	N. tomentosus	MRG	3	41.18107, -73.62080	7/1-7/7/15
638	N. tomentosus	MRG	3	41.18107, -73.62080	7/1-7/7/15
639	N. tomentosus	MRG	3	41.18107, -73.62080	7/1-7/7/15
640	N. tomentosus	MRG	3	41.18107, -73.62080	7/1-7/7/15
641	N. tomentosus	MRG	3	41.18107, -73.62080	7/1-7/7/15
642	N. tomentosus	MRG	3	41.18107, -73.62080	7/1-7/7/15
643	N. tomentosus	MRG	3	41.18107, -73.62080	7/1-7/7/15
644	O. noveboracense	MRG	3	41.18107, -73.62080	7/1-7/7/15
645	O. noveboracense	MRG	3	41.18107, -73.62080	7/1-7/7/15
646	O. noveboracense	MRG	3	41.18107, -73.62080	7/1-7/7/15
647	O. noveboracense	MRG	3	41.18107, -73.62080	7/1-7/7/15
648	O. noveboracense	MRG	3	41.18107, -73.62080	7/1-7/7/15
649	O. noveboracense	MRG	3	41.18107, -73.62080	7/1-7/7/15
650	O. noveboracense	MRG	3	41.18107, -73.62080	7/1-7/7/15
651	O. noveboracense	MRG	3	41.18107, -73.62080	7/1-7/7/15
652	O. noveboracense	MRG	3	41.18107, -73.62080	7/1-7/7/15
653	O. noveboracense	MRG	3	41.18107, -73.62080	7/1-7/7/15
654	O. noveboracense	MRG	3	41.18107, -73.62080	7/1-7/7/15
655	O. noveboracense	MRG	3	41.18107, -73.62080	7/1-7/7/15
656	O. noveboracense	MRG	3	41.18107, -73.62080	7/1-7/7/15
657	O. noveboracense	MRG	3	41.18107, -73.62080	7/1-7/7/15
658	O. noveboracense	MRG	3	41.18107, -73.62080	7/1-7/7/15
659	O. noveboracense	MRG	3	41.18107, -73.62080	7/1-7/7/15
660	O. noveboracense	MRG	3	41.18107, -73.62080	7/1-7/7/15
661	O. noveboracense	MRG	3	41.18107, -73.62080	7/1-7/7/15
662	O. noveboracense	MRG	3	41.18107, -73.62080	7/1-7/7/15
663	O. noveboracense	MRG	3	41.18107, -73.62080	7/1-7/7/15
664	O. noveboracense	MRG	3	41.18107, -73.62080	7/1-7/7/15
665	O. noveboracense	MRG	3	41.18107, -73.62080	7/1-7/7/15
666	O. noveboracense	MRG	3	41.18107, -73.62080	7/1-7/7/15
667	O. noveboracense	MRG	3	41.18107, -73.62080	7/1-7/7/15
668	O. noveboracense	MRG	3	41.18107, -73.62080	7/1-7/7/15
669	O. noveboracense	MRG	3	41.18107, -73.62080	7/1-7/7/15
670	O. noveboracense	MRG	3	41.18107, -73.62080	7/1-7/7/15
671	O. noveboracense	MRG	3	41.18107, -73.62080	7/1-7/7/15
672	O. noveboracense	MRG	3	41.18107, -73.62080	7/1-7/7/15
673	O. noveboracense	MRG	3	41.18107, -73.62080	7/1-7/7/15
674	O. noveboracense	MRG	3	41.18107, -73.62080	7/1-7/7/15
675	O. noveboracense	MRG	3	41.18107, -73.62080	7/1-7/7/15
676	O. noveboracense	MRG	3	41.18107, -73.62080	7/1-7/7/15
677	O. noveboracense	MRG	3	41.18107, -73.62080	7/1-7/7/15
678	O. noveboracense	MRG	3	41.18107, -73.62080	7/1-7/7/15
679	O. noveboracense	MRG	3	41.18107, -73.62080	7/1-7/7/15
680	N. orbicollis	MRG	3	41.18107, -73.62080	7/1-7/7/15
681	N. orbicollis	MRG	3	41.18107, -73.62080	7/1-7/7/15
682	N. orbicollis	MRG	3	41.18107, -73.62080	7/1-7/7/15
683	N. orbicollis	MRG	3	41.18107, -73.62080	7/1-7/7/15
684	N. orbicollis	MRG	3	41.18107, -73.62080	7/1-7/7/15
685	Necrophila americana	CSH	1	41.06169, -73.68920	7/3-7/10/15
686	Necrophila americana	CSH	1	41.06169, -73.68920	7/3-7/10/15
687	N. orbicollis	CSH	1	41.06169, -73.68920	7/3-7/10/15
688	O. noveboracense	CSH	1	41.06169, -73.68920	7/3-7/10/15
689	O. noveboracense	CSH	1	41.06169, -73.68920	7/3-7/10/15
690	O. noveboracense	CSH	1	41.06169, -73.68920	7/3-7/10/15
691	O. noveboracense	CSH	1	41.06169, -73.68920	7/3-7/10/15
692	N. tomentosus	CSH	1	41.06169, -73.68920	7/3-7/10/15
693	N. tomentosus	CSH	1	41.06169, -73.68920	7/3-7/10/15
694	N. tomentosus	CSH	1	41.06169, -73.68920	7/3-7/10/15
695	N. tomentosus	CSH	1	41.06169, -73.68920	7/3-7/10/15
696	N. tomentosus	CSH	1	41.06169, -73.68920	7/3-7/10/15
697	N. tomentosus	CSH	1	41.06169, -73.68920	7/3-7/10/15
698	N. tomentosus	CSH	1	41.06169, -73.68920	7/3-7/10/15
699	N. tomentosus	CSH	1	41.06169, -73.68920	7/3-7/10/15
700	N. tomentosus	CSH	1	41.06169, -73.68920	7/3-7/10/15
701	N. tomentosus	CSH	1	41.06169, -73.68920	7/3-7/10/15
702	N. tomentosus	CSH	1	41.06169, -73.68920	7/3-7/10/15
703	N. tomentosus	CSH	1	41.06169, -73.68920	7/3-7/10/15
704	N. tomentosus	CSH	1	41.06169, -73.68920	7/3-7/10/15
705	N. tomentosus	CSH	1	41.06169, -73.68920	7/3-7/10/15
706	N. tomentosus	CSH	1	41.06169, -73.68920	7/3-7/10/15
707	N. tomentosus	CSH	1	41.06169, -73.68920	7/3-7/10/15
708	N. tomentosus	CSH	1	41.06169, -73.68920	7/3-7/10/15
709	N. tomentosus	CSH	1	41.06169, -73.68920	7/3-7/10/15
710	N. tomentosus	CSH	1	41.06169, -73.68920	7/3-7/10/15
711	N. tomentosus	CSH	1	41.06169, -73.68920	7/3-7/10/15
712	N. tomentosus	CSH	1	41.06169, -73.68920	7/3-7/10/15
713	N. tomentosus	CSH	1	41.06169, -73.68920	7/3-7/10/15
714	Necrophila americana	CSH	2	41.06502, -73.69263	7/3-7/10/15
715	Necrophila americana	CSH	2	41.06502, -73.69263	7/3-7/10/15
716	Necrophila americana	CSH	2	41.06502, -73.69263	7/3-7/10/15
717	Necrophila americana	CSH	2	41.06502, -73.69263	7/3-7/10/15
718	Necrophila americana	CSH	2	41.06502, -73.69263	7/3-7/10/15
719	N. tomentosus	CSH	2	41.06502, -73.69263	7/3-7/10/15
720	N. tomentosus	CSH	2	41.06502, -73.69263	7/3-7/10/15
721	N. tomentosus	CSH	2	41.06502, -73.69263	7/3-7/10/15
722	N. tomentosus	CSH	2	41.06502, -73.69263	7/3-7/10/15
723	O. noveboracense	CSH	2	41.06502, -73.69263	7/3-7/10/15
724	O. noveboracense	CSH	2	41.06502, -73.69263	7/3-7/10/15
725	O. noveboracense	CSH	2	41.06502, -73.69263	7/3-7/10/15
726	O. noveboracense	CSH	2	41.06502, -73.69263	7/3-7/10/15
727	O. noveboracense	CSH	3	41.06617, -73.69013	7/3-7/10/15
728	O. noveboracense	CSH	3	41.06617, -73.69013	7/3-7/10/15
729	O. noveboracense	CSH	3	41.06617, -73.69013	7/3-7/10/15
730	O. noveboracense	CSH	3	41.06617, -73.69013	7/3-7/10/15
731	O. noveboracense	CSH	3	41.06617, -73.69013	7/3-7/10/15
732	O. noveboracense	CSH	3	41.06617, -73.69013	7/3-7/10/15
733	O. noveboracense	CSH	3	41.06617, -73.69013	7/3-7/10/15
734	O. noveboracense	CSH	3	41.06617, -73.69013	7/3-7/10/15
735	O. noveboracense	CSH	3	41.06617, -73.69013	7/3-7/10/15
736	O. noveboracense	CSH	3	41.06617, -73.69013	7/3-7/10/15
737	O. noveboracense	CSH	3	41.06617, -73.69013	7/3-7/10/15
738	O. noveboracense	CSH	3	41.06617, -73.69013	7/3-7/10/15
739	N. pustulatus	CSH	3	41.06617, -73.69013	7/3-7/10/15
740	N. pustulatus	CSH	3	41.06617, -73.69013	7/3-7/10/15
741	N. orbicollis	CSH	3	41.06617, -73.69013	7/3-7/10/15
742	N. orbicollis	CSH	3	41.06617, -73.69013	7/3-7/10/15
743	N. orbicollis	CSH	3	41.06617, -73.69013	7/3-7/10/15
744	N. orbicollis	CSH	3	41.06617, -73.69013	7/3-7/10/15
745	N. tomentosus	CSH	3	41.06617, -73.69013	7/3-7/10/15
746	N. tomentosus	CSH	3	41.06617, -73.69013	7/3-7/10/15
747	N. tomentosus	CSH	3	41.06617, -73.69013	7/3-7/10/15
748	N. tomentosus	CSH	3	41.06617, -73.69013	7/3-7/10/15
749	N. tomentosus	CSH	3	41.06617, -73.69013	7/3-7/10/15
750	N. tomentosus	CSH	3	41.06617, -73.69013	7/3-7/10/15
751	N. tomentosus	CSH	3	41.06617, -73.69013	7/3-7/10/15
752	N. tomentosus	CSH	3	41.06617, -73.69013	7/3-7/10/15
753	N. tomentosus	CSH	3	41.06617, -73.69013	7/3-7/10/15
754	O. noveboracense	NYBG	1	40.86544, -73.87754	7/7-7/15/15
755	O. noveboracense	NYBG	1	40.86544, -73.87754	7/7-7/15/15
756	O. noveboracense	NYBG	1	40.86544, -73.87754	7/7-7/15/15
757	O. noveboracense	NYBG	1	40.86544, -73.87754	7/7-7/15/15
758	O. noveboracense	NYBG	1	40.86544, -73.87754	7/7-7/15/15
759	O. noveboracense	NYBG	1	40.86544, -73.87754	7/7-7/15/15
760	O. noveboracense	NYBG	1	40.86544, -73.87754	7/7-7/15/15
761	O. noveboracense	NYBG	1	40.86544, -73.87754	7/7-7/15/15
762	O. noveboracense	NYBG	1	40.86544, -73.87754	7/7-7/15/15
763	O. noveboracense	NYBG	1	40.86544, -73.87754	7/7-7/15/15
764	O. noveboracense	NYBG	1	40.86544, -73.87754	7/7-7/15/15
765	O. noveboracense	NYBG	1	40.86544, -73.87754	7/7-7/15/15
766	O. noveboracense	NYBG	1	40.86544, -73.87754	7/7-7/15/15
767	O. noveboracense	NYBG	1	40.86544, -73.87754	7/7-7/15/15
768	O. noveboracense	NYBG	1	40.86544, -73.87754	7/7-7/15/15
769	O. noveboracense	NYBG	1	40.86544, -73.87754	7/7-7/15/15
770	O. noveboracense	NYBG	1	40.86544, -73.87754	7/7-7/15/15
771	O. noveboracense	NYBG	1	40.86544, -73.87754	7/7-7/15/15
772	O. noveboracense	NYBG	1	40.86544, -73.87754	7/7-7/15/15
773	O. noveboracense	NYBG	1	40.86544, -73.87754	7/7-7/15/15
774	O. noveboracense	NYBG	1	40.86544, -73.87754	7/7-7/15/15
775	O. noveboracense	NYBG	1	40.86544, -73.87754	7/7-7/15/15
776	O. noveboracense	NYBG	1	40.86544, -73.87754	7/7-7/15/15
777	O. noveboracense	NYBG	1	40.86544, -73.87754	7/7-7/15/15
778	O. noveboracense	NYBG	1	40.86544, -73.87754	7/7-7/15/15
779	O. noveboracense	NYBG	1	40.86544, -73.87754	7/7-7/15/15
780	O. noveboracense	NYBG	1	40.86544, -73.87754	7/7-7/15/15
781	O. noveboracense	NYBG	1	40.86544, -73.87754	7/7-7/15/15
782	O. noveboracense	NYBG	1	40.86544, -73.87754	7/7-7/15/15
783	O. noveboracense	NYBG	1	40.86544, -73.87754	7/7-7/15/15
784	O. noveboracense	NYBG	1	40.86544, -73.87754	7/7-7/15/15
785	O. noveboracense	NYBG	1	40.86544, -73.87754	7/7-7/15/15
786	O. noveboracense	NYBG	1	40.86544, -73.87754	7/7-7/15/15
787	O. noveboracense	NYBG	1	40.86544, -73.87754	7/7-7/15/15
788	O. noveboracense	NYBG	1	40.86544, -73.87754	7/7-7/15/15
789	O. noveboracense	NYBG	1	40.86544, -73.87754	7/7-7/15/15
790	O. noveboracense	NYBG	1	40.86544, -73.87754	7/7-7/15/15
791	O. noveboracense	NYBG	1	40.86544, -73.87754	7/7-7/15/15
792	O. noveboracense	NYBG	1	40.86544, -73.87754	7/7-7/15/15
793	O. noveboracense	NYBG	1	40.86544, -73.87754	7/7-7/15/15
794	O. noveboracense	NYBG	1	40.86544, -73.87754	7/7-7/15/15
795	O. noveboracense	NYBG	1	40.86544, -73.87754	7/7-7/15/15
796	O. noveboracense	NYBG	1	40.86544, -73.87754	7/7-7/15/15
797	O. noveboracense	NYBG	1	40.86544, -73.87754	7/7-7/15/15
798	O. noveboracense	NYBG	1	40.86544, -73.87754	7/7-7/15/15
799	O. noveboracense	NYBG	1	40.86544, -73.87754	7/7-7/15/15
800	O. noveboracense	NYBG	1	40.86544, -73.87754	7/7-7/15/15
801	O. noveboracense	NYBG	1	40.86544, -73.87754	7/7-7/15/15
802	O. inequale	NYBG	1	40.86544, -73.87754	7/7-7/15/15
803	O. inequale	NYBG	1	40.86544, -73.87754	7/7-7/15/15
804	O. inequale	NYBG	1	40.86544, -73.87754	7/7-7/15/15
805	O. inequale	NYBG	1	40.86544, -73.87754	7/7-7/15/15
806	O. inequale	NYBG	1	40.86544, -73.87754	7/7-7/15/15
807	O. inequale	NYBG	1	40.86544, -73.87754	7/7-7/15/15
808	O. inequale	NYBG	1	40.86544, -73.87754	7/7-7/15/15
809	O. inequale	NYBG	1	40.86544, -73.87754	7/7-7/15/15
810	O. inequale	NYBG	1	40.86544, -73.87754	7/7-7/15/15
811	O. inequale	NYBG	1	40.86544, -73.87754	7/7-7/15/15
812	O. inequale	NYBG	1	40.86544, -73.87754	7/7-7/15/15
813	O. inequale	NYBG	1	40.86544, -73.87754	7/7-7/15/15
814	O. inequale	NYBG	1	40.86544, -73.87754	7/7-7/15/15
815	O. inequale	NYBG	1	40.86544, -73.87754	7/7-7/15/15
816	O. inequale	NYBG	1	40.86544, -73.87754	7/7-7/15/15
817	O. inequale	NYBG	1	40.86544, -73.87754	7/7-7/15/15
818	O. inequale	NYBG	1	40.86544, -73.87754	7/7-7/15/15
819	N. orbicollis	NYBG	1	40.86544, -73.87754	7/7-7/15/15
820	N. orbicollis	NYBG	1	40.86544, -73.87754	7/7-7/15/15
821	N. orbicollis	NYBG	1	40.86544, -73.87754	7/7-7/15/15
822	N. orbicollis	NYBG	1	40.86544, -73.87754	7/7-7/15/15
823	N. orbicollis	NYBG	1	40.86544, -73.87754	7/7-7/15/15
824	N. orbicollis	NYBG	1	40.86544, -73.87754	7/7-7/15/15
825	N. orbicollis	NYBG	1	40.86544, -73.87754	7/7-7/15/15
826	N. orbicollis	NYBG	1	40.86544, -73.87754	7/7-7/15/15
827	N. orbicollis	NYBG	1	40.86544, -73.87754	7/7-7/15/15
828	N. orbicollis	NYBG	1	40.86544, -73.87754	7/7-7/15/15
829	N. orbicollis	NYBG	1	40.86544, -73.87754	7/7-7/15/15
830	N. orbicollis	NYBG	1	40.86544, -73.87754	7/7-7/15/15
831	N. orbicollis	NYBG	1	40.86544, -73.87754	7/7-7/15/15
832	N. orbicollis	NYBG	1	40.86544, -73.87754	7/7-7/15/15
833	N. orbicollis	NYBG	1	40.86544, -73.87754	7/7-7/15/15
834	N. orbicollis	NYBG	1	40.86544, -73.87754	7/7-7/15/15
835	N. orbicollis	NYBG	1	40.86544, -73.87754	7/7-7/15/15
836	N. orbicollis	NYBG	1	40.86544, -73.87754	7/7-7/15/15
837	N. orbicollis	NYBG	1	40.86544, -73.87754	7/7-7/15/15
838	N. orbicollis	NYBG	1	40.86544, -73.87754	7/7-7/15/15
839	N. orbicollis	NYBG	1	40.86544, -73.87754	7/7-7/15/15
840	N. pustulatus	NYBG	1	40.86544, -73.87754	7/7-7/15/15
841	N. pustulatus	NYBG	1	40.86544, -73.87754	7/7-7/15/15
842	N. tomentosus	NYBG	1	40.86544, -73.87754	7/7-7/15/15
843	N. tomentosus	NYBG	1	40.86544, -73.87754	7/7-7/15/15
844	N. tomentosus	NYBG	1	40.86544, -73.87754	7/7-7/15/15
845	N. tomentosus	NYBG	1	40.86544, -73.87754	7/7-7/15/15
846	N. tomentosus	NYBG	1	40.86544, -73.87754	7/7-7/15/15
847	N. tomentosus	NYBG	1	40.86544, -73.87754	7/7-7/15/15
848	N. tomentosus	NYBG	1	40.86544, -73.87754	7/7-7/15/15
849	N. tomentosus	NYBG	1	40.86544, -73.87754	7/7-7/15/15
850	N. tomentosus	NYBG	1	40.86544, -73.87754	7/7-7/15/15
851	N. tomentosus	NYBG	1	40.86544, -73.87754	7/7-7/15/15
852	N. tomentosus	NYBG	1	40.86544, -73.87754	7/7-7/15/15
853	N. tomentosus	NYBG	1	40.86544, -73.87754	7/7-7/15/15
854	N. tomentosus	NYBG	1	40.86544, -73.87754	7/7-7/15/15
855	N. tomentosus	NYBG	1	40.86544, -73.87754	7/7-7/15/15
856	N. tomentosus	NYBG	1	40.86544, -73.87754	7/7-7/15/15
857	N. tomentosus	NYBG	1	40.86544, -73.87754	7/7-7/15/15
858	N. tomentosus	NYBG	1	40.86544, -73.87754	7/7-7/15/15
859	N. tomentosus	NYBG	1	40.86544, -73.87754	7/7-7/15/15
860	N. tomentosus	NYBG	1	40.86544, -73.87754	7/7-7/15/15
861	N. tomentosus	NYBG	1	40.86544, -73.87754	7/7-7/15/15
862	N. tomentosus	NYBG	1	40.86544, -73.87754	7/7-7/15/15
863	N. tomentosus	NYBG	1	40.86544, -73.87754	7/7-7/15/15
864	N. tomentosus	NYBG	1	40.86544, -73.87754	7/7-7/15/15
865	N. tomentosus	NYBG	1	40.86544, -73.87754	7/7-7/15/15
866	N. tomentosus	NYBG	1	40.86544, -73.87754	7/7-7/15/15
867	N. tomentosus	NYBG	1	40.86544, -73.87754	7/7-7/15/15
868	N. tomentosus	NYBG	1	40.86544, -73.87754	7/7-7/15/15
869	N. tomentosus	NYBG	1	40.86544, -73.87754	7/7-7/15/15
870	N. tomentosus	NYBG	1	40.86544, -73.87754	7/7-7/15/15
871	N. tomentosus	NYBG	1	40.86544, -73.87754	7/7-7/15/15
872	N. tomentosus	NYBG	1	40.86544, -73.87754	7/7-7/15/15
873	N. tomentosus	NYBG	1	40.86544, -73.87754	7/7-7/15/15
874	N. tomentosus	NYBG	1	40.86544, -73.87754	7/7-7/15/15
875	N. tomentosus	NYBG	1	40.86544, -73.87754	7/7-7/15/15
876	N. tomentosus	NYBG	1	40.86544, -73.87754	7/7-7/15/15
877	N. tomentosus	NYBG	1	40.86544, -73.87754	7/7-7/15/15
878	N. tomentosus	NYBG	1	40.86544, -73.87754	7/7-7/15/15
879	N. tomentosus	NYBG	1	40.86544, -73.87754	7/7-7/15/15
880	N. tomentosus	NYBG	1	40.86544, -73.87754	7/7-7/15/15
881	N. tomentosus	NYBG	1	40.86544, -73.87754	7/7-7/15/15
882	N. tomentosus	NYBG	1	40.86544, -73.87754	7/7-7/15/15
883	N. tomentosus	NYBG	1	40.86544, -73.87754	7/7-7/15/15
884	N. tomentosus	NYBG	1	40.86544, -73.87754	7/7-7/15/15
885	N. tomentosus	NYBG	1	40.86544, -73.87754	7/7-7/15/15
886	N. tomentosus	NYBG	1	40.86544, -73.87754	7/7-7/15/15
887	N. tomentosus	NYBG	1	40.86544, -73.87754	7/7-7/15/15
888	N. tomentosus	NYBG	1	40.86544, -73.87754	7/7-7/15/15
889	N. tomentosus	NYBG	1	40.86544, -73.87754	7/7-7/15/15
890	N. tomentosus	NYBG	1	40.86544, -73.87754	7/7-7/15/15
891	N. tomentosus	NYBG	1	40.86544, -73.87754	7/7-7/15/15
892	N. tomentosus	NYBG	1	40.86544, -73.87754	7/7-7/15/15
893	N. tomentosus	NYBG	1	40.86544, -73.87754	7/7-7/15/15
894	N. tomentosus	NYBG	1	40.86544, -73.87754	7/7-7/15/15
895	N. tomentosus	NYBG	1	40.86544, -73.87754	7/7-7/15/15
896	N. tomentosus	NYBG	1	40.86544, -73.87754	7/7-7/15/15
897	N. tomentosus	NYBG	1	40.86544, -73.87754	7/7-7/15/15
898	N. tomentosus	NYBG	1	40.86544, -73.87754	7/7-7/15/15
899	N. tomentosus	NYBG	1	40.86544, -73.87754	7/7-7/15/15
900	N. tomentosus	NYBG	1	40.86544, -73.87754	7/7-7/15/15
901	N. tomentosus	NYBG	1	40.86544, -73.87754	7/7-7/15/15
902	N. tomentosus	NYBG	1	40.86544, -73.87754	7/7-7/15/15
903	N. tomentosus	NYBG	1	40.86544, -73.87754	7/7-7/15/15
904	N. tomentosus	NYBG	1	40.86544, -73.87754	7/7-7/15/15
905	N. tomentosus	NYBG	1	40.86544, -73.87754	7/7-7/15/15
906	N. tomentosus	NYBG	1	40.86544, -73.87754	7/7-7/15/15
907	N. tomentosus	NYBG	1	40.86544, -73.87754	7/7-7/15/15
908	N. tomentosus	NYBG	1	40.86544, -73.87754	7/7-7/15/15
909	N. tomentosus	NYBG	1	40.86544, -73.87754	7/7-7/15/15
910	N. tomentosus	NYBG	1	40.86544, -73.87754	7/7-7/15/15
911	N. tomentosus	NYBG	1	40.86544, -73.87754	7/7-7/15/15
912	N. tomentosus	NYBG	1	40.86544, -73.87754	7/7-7/15/15
913	N. orbicollis	NYBG	2	40.86424, -73.87500	7/7-7/15/15
914	N. orbicollis	NYBG	2	40.86424, -73.87500	7/7-7/15/15
915	N. orbicollis	NYBG	2	40.86424, -73.87500	7/7-7/15/15
916	N. orbicollis	NYBG	2	40.86424, -73.87500	7/7-7/15/15
917	N. orbicollis	NYBG	2	40.86424, -73.87500	7/7-7/15/15
918	N. orbicollis	NYBG	2	40.86424, -73.87500	7/7-7/15/15
919	N. orbicollis	NYBG	2	40.86424, -73.87500	7/7-7/15/15
920	N. orbicollis	NYBG	2	40.86424, -73.87500	7/7-7/15/15
921	N. orbicollis	NYBG	2	40.86424, -73.87500	7/7-7/15/15
922	N. orbicollis	NYBG	2	40.86424, -73.87500	7/7-7/15/15
923	N. orbicollis	NYBG	2	40.86424, -73.87500	7/7-7/15/15
924	N. orbicollis	NYBG	2	40.86424, -73.87500	7/7-7/15/15
925	N. orbicollis	NYBG	2	40.86424, -73.87500	7/7-7/15/15
926	N. orbicollis	NYBG	2	40.86424, -73.87500	7/7-7/15/15
927	N. orbicollis	NYBG	2	40.86424, -73.87500	7/7-7/15/15
928	N. orbicollis	NYBG	2	40.86424, -73.87500	7/7-7/15/15
929	N. tomentosus	NYBG	2	40.86424, -73.87500	7/7-7/15/15
930	N. tomentosus	NYBG	2	40.86424, -73.87500	7/7-7/15/15
931	N. tomentosus	NYBG	2	40.86424, -73.87500	7/7-7/15/15
932	N. tomentosus	NYBG	2	40.86424, -73.87500	7/7-7/15/15
933	N. tomentosus	NYBG	2	40.86424, -73.87500	7/7-7/15/15
934	N. tomentosus	NYBG	2	40.86424, -73.87500	7/7-7/15/15
935	N. tomentosus	NYBG	2	40.86424, -73.87500	7/7-7/15/15
936	N. tomentosus	NYBG	2	40.86424, -73.87500	7/7-7/15/15
937	N. tomentosus	NYBG	2	40.86424, -73.87500	7/7-7/15/15
938	N. tomentosus	NYBG	2	40.86424, -73.87500	7/7-7/15/15
939	N. tomentosus	NYBG	2	40.86424, -73.87500	7/7-7/15/15
940	N. tomentosus	NYBG	2	40.86424, -73.87500	7/7-7/15/15
941	N. tomentosus	NYBG	2	40.86424, -73.87500	7/7-7/15/15
942	N. tomentosus	NYBG	2	40.86424, -73.87500	7/7-7/15/15
943	N. tomentosus	NYBG	2	40.86424, -73.87500	7/7-7/15/15
944	N. tomentosus	NYBG	2	40.86424, -73.87500	7/7-7/15/15
945	N. tomentosus	NYBG	2	40.86424, -73.87500	7/7-7/15/15
946	N. tomentosus	NYBG	2	40.86424, -73.87500	7/7-7/15/15
947	N. tomentosus	NYBG	2	40.86424, -73.87500	7/7-7/15/15
948	N. tomentosus	NYBG	2	40.86424, -73.87500	7/7-7/15/15
949	N. tomentosus	NYBG	2	40.86424, -73.87500	7/7-7/15/15
950	N. tomentosus	NYBG	2	40.86424, -73.87500	7/7-7/15/15
951	N. tomentosus	NYBG	2	40.86424, -73.87500	7/7-7/15/15
952	N. tomentosus	NYBG	2	40.86424, -73.87500	7/7-7/15/15
953	N. tomentosus	NYBG	2	40.86424, -73.87500	7/7-7/15/15
954	N. tomentosus	NYBG	2	40.86424, -73.87500	7/7-7/15/15
955	N. tomentosus	NYBG	2	40.86424, -73.87500	7/7-7/15/15
956	N. tomentosus	NYBG	2	40.86424, -73.87500	7/7-7/15/15
957	N. tomentosus	NYBG	2	40.86424, -73.87500	7/7-7/15/15
958	N. tomentosus	NYBG	2	40.86424, -73.87500	7/7-7/15/15
959	N. tomentosus	NYBG	2	40.86424, -73.87500	7/7-7/15/15
960	N. tomentosus	NYBG	2	40.86424, -73.87500	7/7-7/15/15
961	N. tomentosus	NYBG	2	40.86424, -73.87500	7/7-7/15/15
962	N. tomentosus	NYBG	2	40.86424, -73.87500	7/7-7/15/15
963	N. tomentosus	NYBG	2	40.86424, -73.87500	7/7-7/15/15
964	N. tomentosus	NYBG	2	40.86424, -73.87500	7/7-7/15/15
965	N. tomentosus	NYBG	2	40.86424, -73.87500	7/7-7/15/15
966	N. tomentosus	NYBG	2	40.86424, -73.87500	7/7-7/15/15
967	N. tomentosus	NYBG	2	40.86424, -73.87500	7/7-7/15/15
968	N. tomentosus	NYBG	2	40.86424, -73.87500	7/7-7/15/15
969	N. tomentosus	NYBG	2	40.86424, -73.87500	7/7-7/15/15
970	N. tomentosus	NYBG	2	40.86424, -73.87500	7/7-7/15/15
971	N. tomentosus	NYBG	2	40.86424, -73.87500	7/7-7/15/15
972	N. tomentosus	NYBG	2	40.86424, -73.87500	7/7-7/15/15
973	N. tomentosus	NYBG	2	40.86424, -73.87500	7/7-7/15/15
974	N. tomentosus	NYBG	2	40.86424, -73.87500	7/7-7/15/15
975	N. tomentosus	NYBG	2	40.86424, -73.87500	7/7-7/15/15
976	N. tomentosus	NYBG	2	40.86424, -73.87500	7/7-7/15/15
977	N. tomentosus	NYBG	2	40.86424, -73.87500	7/7-7/15/15
978	N. tomentosus	NYBG	2	40.86424, -73.87500	7/7-7/15/15
979	N. tomentosus	NYBG	2	40.86424, -73.87500	7/7-7/15/15
980	N. tomentosus	NYBG	2	40.86424, -73.87500	7/7-7/15/15
981	N. tomentosus	NYBG	2	40.86424, -73.87500	7/7-7/15/15
982	N. tomentosus	NYBG	2	40.86424, -73.87500	7/7-7/15/15
983	N. tomentosus	NYBG	2	40.86424, -73.87500	7/7-7/15/15
984	N. defodiens	NYBG	2	40.86424, -73.87500	7/7-7/15/15
985	N. pustulatus	NYBG	2	40.86424, -73.87500	7/7-7/15/15
986	N. pustulatus	NYBG	2	40.86424, -73.87500	7/7-7/15/15
987	N. pustulatus	NYBG	2	40.86424, -73.87500	7/7-7/15/15
988	N. pustulatus	NYBG	2	40.86424, -73.87500	7/7-7/15/15
989	N. pustulatus	NYBG	2	40.86424, -73.87500	7/7-7/15/15
990	O. noveboracense	NYBG	2	40.86424, -73.87500	7/7-7/15/15
991	O. noveboracense	NYBG	2	40.86424, -73.87500	7/7-7/15/15
992	O. noveboracense	NYBG	2	40.86424, -73.87500	7/7-7/15/15
993	O. noveboracense	NYBG	2	40.86424, -73.87500	7/7-7/15/15
994	O. noveboracense	NYBG	2	40.86424, -73.87500	7/7-7/15/15
995	O. noveboracense	NYBG	2	40.86424, -73.87500	7/7-7/15/15
996	O. noveboracense	NYBG	2	40.86424, -73.87500	7/7-7/15/15
997	O. noveboracense	NYBG	2	40.86424, -73.87500	7/7-7/15/15
998	O. noveboracense	NYBG	2	40.86424, -73.87500	7/7-7/15/15
999	O. noveboracense	NYBG	2	40.86424, -73.87500	7/7-7/15/15
1000	O. noveboracense	NYBG	2	40.86424, -73.87500	7/7-7/15/15
1001	O. noveboracense	NYBG	2	40.86424, -73.87500	7/7-7/15/15
1002	O. noveboracense	NYBG	2	40.86424, -73.87500	7/7-7/15/15
1003	O. noveboracense	NYBG	2	40.86424, -73.87500	7/7-7/15/15
1004	N. tomentosus	NYBG	3	40.86069, -73.87699	7/7-7/15/15
1005	N. tomentosus	NYBG	3	40.86069, -73.87699	7/7-7/15/15
1006	N. tomentosus	NYBG	3	40.86069, -73.87699	7/7-7/15/15
1007	N. tomentosus	NYBG	3	40.86069, -73.87699	7/7-7/15/15
1008	N. tomentosus	NYBG	3	40.86069, -73.87699	7/7-7/15/15
1009	N. tomentosus	NYBG	3	40.86069, -73.87699	7/7-7/15/15
1010	N. tomentosus	NYBG	3	40.86069, -73.87699	7/7-7/15/15
1011	N. tomentosus	NYBG	3	40.86069, -73.87699	7/7-7/15/15
1012	N. tomentosus	NYBG	3	40.86069, -73.87699	7/7-7/15/15
1013	N. tomentosus	NYBG	3	40.86069, -73.87699	7/7-7/15/15
1014	N. tomentosus	NYBG	3	40.86069, -73.87699	7/7-7/15/15
1015	N. tomentosus	NYBG	3	40.86069, -73.87699	7/7-7/15/15
1016	N. tomentosus	NYBG	3	40.86069, -73.87699	7/7-7/15/15
1017	N. tomentosus	NYBG	3	40.86069, -73.87699	7/7-7/15/15
1018	N. tomentosus	NYBG	3	40.86069, -73.87699	7/7-7/15/15
1019	N. tomentosus	NYBG	3	40.86069, -73.87699	7/7-7/15/15
1020	N. tomentosus	NYBG	3	40.86069, -73.87699	7/7-7/15/15
1021	N. tomentosus	NYBG	3	40.86069, -73.87699	7/7-7/15/15
1022	N. tomentosus	NYBG	3	40.86069, -73.87699	7/7-7/15/15
1023	N. tomentosus	NYBG	3	40.86069, -73.87699	7/7-7/15/15
1024	N. tomentosus	NYBG	3	40.86069, -73.87699	7/7-7/15/15
1025	N. tomentosus	NYBG	3	40.86069, -73.87699	7/7-7/15/15
1026	N. tomentosus	NYBG	3	40.86069, -73.87699	7/7-7/15/15
1027	N. tomentosus	NYBG	3	40.86069, -73.87699	7/7-7/15/15
1028	N. tomentosus	NYBG	3	40.86069, -73.87699	7/7-7/15/15
1029	N. tomentosus	NYBG	3	40.86069, -73.87699	7/7-7/15/15
1030	N. tomentosus	NYBG	3	40.86069, -73.87699	7/7-7/15/15
1031	N. tomentosus	NYBG	3	40.86069, -73.87699	7/7-7/15/15
1032	N. tomentosus	NYBG	3	40.86069, -73.87699	7/7-7/15/15
1033	N. tomentosus	NYBG	3	40.86069, -73.87699	7/7-7/15/15
1034	N. tomentosus	NYBG	3	40.86069, -73.87699	7/7-7/15/15
1035	N. tomentosus	NYBG	3	40.86069, -73.87699	7/7-7/15/15
1036	N. tomentosus	NYBG	3	40.86069, -73.87699	7/7-7/15/15
1037	N. tomentosus	NYBG	3	40.86069, -73.87699	7/7-7/15/15
1038	N. tomentosus	NYBG	3	40.86069, -73.87699	7/7-7/15/15
1039	N. tomentosus	NYBG	3	40.86069, -73.87699	7/7-7/15/15
1040	N. tomentosus	NYBG	3	40.86069, -73.87699	7/7-7/15/15
1041	N. tomentosus	NYBG	3	40.86069, -73.87699	7/7-7/15/15
1042	N. tomentosus	NYBG	3	40.86069, -73.87699	7/7-7/15/15
1043	N. orbicollis	NYBG	3	40.86069, -73.87699	7/7-7/15/15
1044	N. orbicollis	NYBG	3	40.86069, -73.87699	7/7-7/15/15
1045	N. orbicollis	NYBG	3	40.86069, -73.87699	7/7-7/15/15
1046	N. orbicollis	NYBG	3	40.86069, -73.87699	7/7-7/15/15
1047	N. orbicollis	NYBG	3	40.86069, -73.87699	7/7-7/15/15
1048	N. orbicollis	NYBG	3	40.86069, -73.87699	7/7-7/15/15
1049	N. orbicollis	NYBG	3	40.86069, -73.87699	7/7-7/15/15
1050	N. orbicollis	NYBG	3	40.86069, -73.87699	7/7-7/15/15
1051	N. orbicollis	NYBG	3	40.86069, -73.87699	7/7-7/15/15
1052	N. orbicollis	NYBG	3	40.86069, -73.87699	7/7-7/15/15
1053	N. orbicollis	NYBG	3	40.86069, -73.87699	7/7-7/15/15
1054	N. orbicollis	NYBG	3	40.86069, -73.87699	7/7-7/15/15
1055	N. orbicollis	NYBG	3	40.86069, -73.87699	7/7-7/15/15
1056	O. noveboracense	NYBG	3	40.86069, -73.87699	7/7-7/15/15
1057	O. noveboracense	NYBG	3	40.86069, -73.87699	7/7-7/15/15
1058	O. noveboracense	NYBG	3	40.86069, -73.87699	7/7-7/15/15
1059	O. noveboracense	NYBG	3	40.86069, -73.87699	7/7-7/15/15
1060	O. noveboracense	NYBG	3	40.86069, -73.87699	7/7-7/15/15
1061	O. noveboracense	NYBG	3	40.86069, -73.87699	7/7-7/15/15
1062	O. noveboracense	NYBG	3	40.86069, -73.87699	7/7-7/15/15
1063	O. noveboracense	NYBG	3	40.86069, -73.87699	7/7-7/15/15
1064	O. noveboracense	NYBG	3	40.86069, -73.87699	7/7-7/15/15
1065	O. noveboracense	NYBG	3	40.86069, -73.87699	7/7-7/15/15
1066	O. noveboracense	NYBG	3	40.86069, -73.87699	7/7-7/15/15
1067	O. noveboracense	NYBG	3	40.86069, -73.87699	7/7-7/15/15
1068	O. noveboracense	NYBG	3	40.86069, -73.87699	7/7-7/15/15
1069	O. noveboracense	NYBG	3	40.86069, -73.87699	7/7-7/15/15
1070	O. noveboracense	NYBG	3	40.86069, -73.87699	7/7-7/15/15
1071	N. pustulatus	NYBG	3	40.86069, -73.87699	7/7-7/15/15
1072	O. inequale	NYBG	3	40.86069, -73.87699	7/7-7/15/15
1073	O. inequale	NYBG	3	40.86069, -73.87699	7/7-7/15/15
1074	O. inequale	NYBG	3	40.86069, -73.87699	7/7-7/15/15
1075	O. inequale	NYBG	3	40.86069, -73.87699	7/7-7/15/15
1076	O. inequale	NYBG	3	40.86069, -73.87699	7/7-7/15/15
1077	O. inequale	NYBG	3	40.86069, -73.87699	7/7-7/15/15
1078	O. inequale	NYBG	3	40.86069, -73.87699	7/7-7/15/15
1079	O. inequale	NYBG	3	40.86069, -73.87699	7/7-7/15/15
1080	N. tomentosus	VCP	1	40.89844, -73.89615	7/7-7/15/15
1081	N. tomentosus	VCP	1	40.89844, -73.89615	7/7-7/15/15
1082	N. tomentosus	VCP	1	40.89844, -73.89615	7/7-7/15/15
1083	N. tomentosus	VCP	1	40.89844, -73.89615	7/7-7/15/15
1084	N. tomentosus	VCP	1	40.89844, -73.89615	7/7-7/15/15
1085	N. tomentosus	VCP	1	40.89844, -73.89615	7/7-7/15/15
1086	N. tomentosus	VCP	1	40.89844, -73.89615	7/7-7/15/15
1087	N. tomentosus	VCP	1	40.89844, -73.89615	7/7-7/15/15
1088	O. noveboracense	VCP	1	40.89844, -73.89615	7/7-7/15/15
1089	O. noveboracense	VCP	1	40.89844, -73.89615	7/7-7/15/15
1090	O. noveboracense	VCP	1	40.89844, -73.89615	7/7-7/15/15
1091	O. noveboracense	VCP	1	40.89844, -73.89615	7/7-7/15/15
1092	O. noveboracense	VCP	1	40.89844, -73.89615	7/7-7/15/15
1093	O. noveboracense	VCP	1	40.89844, -73.89615	7/7-7/15/15
1094	N. orbicollis	VCP	1	40.89844, -73.89615	7/7-7/15/15
1095	N. orbicollis	VCP	1	40.89844, -73.89615	7/7-7/15/15
1096	N. orbicollis	VCP	1	40.89844, -73.89615	7/7-7/15/15
1097	N. orbicollis	VCP	1	40.89844, -73.89615	7/7-7/15/15
1098	N. tomentosus	VCP	2	40.89843,-73.89340	7/7-7/15/15
1099	N. tomentosus	VCP	2	40.89843,-73.89340	7/7-7/15/15
1100	N. tomentosus	VCP	2	40.89843,-73.89340	7/7-7/15/15
1101	N. tomentosus	VCP	2	40.89843,-73.89340	7/7-7/15/15
1102	N. tomentosus	VCP	2	40.89843,-73.89340	7/7-7/15/15
1103	N. tomentosus	VCP	2	40.89843,-73.89340	7/7-7/15/15
1104	N. tomentosus	VCP	2	40.89843,-73.89340	7/7-7/15/15
1105	N. tomentosus	VCP	2	40.89843,-73.89340	7/7-7/15/15
1106	N. tomentosus	VCP	2	40.89843,-73.89340	7/7-7/15/15
1107	N. tomentosus	VCP	2	40.89843,-73.89340	7/7-7/15/15
1108	N. tomentosus	VCP	2	40.89843,-73.89340	7/7-7/15/15
1109	N. tomentosus	VCP	2	40.89843,-73.89340	7/7-7/15/15
1110	N. tomentosus	VCP	2	40.89843,-73.89340	7/7-7/15/15
1111	N. tomentosus	VCP	2	40.89843,-73.89340	7/7-7/15/15
1112	N. tomentosus	VCP	2	40.89843,-73.89340	7/7-7/15/15
1113	N. tomentosus	VCP	2	40.89843,-73.89340	7/7-7/15/15
1114	N. tomentosus	VCP	2	40.89843,-73.89340	7/7-7/15/15
1115	N. tomentosus	VCP	2	40.89843,-73.89340	7/7-7/15/15
1116	N. tomentosus	VCP	2	40.89843,-73.89340	7/7-7/15/15
1117	N. tomentosus	VCP	2	40.89843,-73.89340	7/7-7/15/15
1118	N. tomentosus	VCP	2	40.89843,-73.89340	7/7-7/15/15
1119	N. tomentosus	VCP	2	40.89843,-73.89340	7/7-7/15/15
1120	N. tomentosus	VCP	2	40.89843,-73.89340	7/7-7/15/15
1121	N. tomentosus	VCP	2	40.89843,-73.89340	7/7-7/15/15
1122	N. tomentosus	VCP	2	40.89843,-73.89340	7/7-7/15/15
1123	N. tomentosus	VCP	2	40.89843,-73.89340	7/7-7/15/15
1124	N. tomentosus	VCP	2	40.89843,-73.89340	7/7-7/15/15
1125	N. tomentosus	VCP	2	40.89843,-73.89340	7/7-7/15/15
1126	N. tomentosus	VCP	2	40.89843,-73.89340	7/7-7/15/15
1127	N. tomentosus	VCP	2	40.89843,-73.89340	7/7-7/15/15
1128	N. tomentosus	VCP	2	40.89843,-73.89340	7/7-7/15/15
1129	N. tomentosus	VCP	2	40.89843,-73.89340	7/7-7/15/15
1130	N. tomentosus	VCP	2	40.89843,-73.89340	7/7-7/15/15
1131	N. tomentosus	VCP	2	40.89843,-73.89340	7/7-7/15/15
1132	N. tomentosus	VCP	2	40.89843,-73.89340	7/7-7/15/15
1133	N. tomentosus	VCP	2	40.89843,-73.89340	7/7-7/15/15
1134	N. tomentosus	VCP	2	40.89843,-73.89340	7/7-7/15/15
1135	N. tomentosus	VCP	2	40.89843,-73.89340	7/7-7/15/15
1136	N. tomentosus	VCP	2	40.89843,-73.89340	7/7-7/15/15
1137	N. tomentosus	VCP	2	40.89843,-73.89340	7/7-7/15/15
1138	N. tomentosus	VCP	2	40.89843,-73.89340	7/7-7/15/15
1139	N. pustulatus	VCP	2	40.89843,-73.89340	7/7-7/15/15
1140	O. inequale	VCP	2	40.89843,-73.89340	7/7-7/15/15
1141	O. inequale	VCP	2	40.89843,-73.89340	7/7-7/15/15
1142	O. noveboracense	VCP	2	40.89843,-73.89340	7/7-7/15/15
1143	O. noveboracense	VCP	2	40.89843,-73.89340	7/7-7/15/15
1144	O. noveboracense	VCP	2	40.89843,-73.89340	7/7-7/15/15
1145	O. noveboracense	VCP	2	40.89843,-73.89340	7/7-7/15/15
1146	O. noveboracense	VCP	2	40.89843,-73.89340	7/7-7/15/15
1147	O. noveboracense	VCP	2	40.89843,-73.89340	7/7-7/15/15
1148	O. noveboracense	VCP	2	40.89843,-73.89340	7/7-7/15/15
1149	N. orbicollis	VCP	2	40.89843,-73.89340	7/7-7/15/15
1150	N. orbicollis	VCP	2	40.89843,-73.89340	7/7-7/15/15
1151	N. orbicollis	VCP	2	40.89843,-73.89340	7/7-7/15/15
1152	N. orbicollis	VCP	2	40.89843,-73.89340	7/7-7/15/15
1153	N. orbicollis	VCP	2	40.89843,-73.89340	7/7-7/15/15
1154	N. orbicollis	VCP	2	40.89843,-73.89340	7/7-7/15/15
1155	N. orbicollis	VCP	2	40.89843,-73.89340	7/7-7/15/15
1156	N. orbicollis	VCP	2	40.89843,-73.89340	7/7-7/15/15
1157	N. orbicollis	VCP	2	40.89843,-73.89340	7/7-7/15/15
1158	N. orbicollis	VCP	2	40.89843,-73.89340	7/7-7/15/15
1159	N. orbicollis	VCP	2	40.89843,-73.89340	7/7-7/15/15
1160	N. orbicollis	VCP	2	40.89843,-73.89340	7/7-7/15/15
1161	N. orbicollis	VCP	2	40.89843,-73.89340	7/7-7/15/15
1162	N. tomentosus	VCP	3	40.89372, -73.89106	7/7-7/15/15
1163	N. tomentosus	VCP	3	40.89372, -73.89106	7/7-7/15/15
1164	N. tomentosus	VCP	3	40.89372, -73.89106	7/7-7/15/15
1165	N. tomentosus	VCP	3	40.89372, -73.89106	7/7-7/15/15
1166	N. tomentosus	VCP	3	40.89372, -73.89106	7/7-7/15/15
1167	N. tomentosus	VCP	3	40.89372, -73.89106	7/7-7/15/15
1168	N. tomentosus	VCP	3	40.89372, -73.89106	7/7-7/15/15
1169	N. tomentosus	VCP	3	40.89372, -73.89106	7/7-7/15/15
1170	N. tomentosus	VCP	3	40.89372, -73.89106	7/7-7/15/15
1171	N. tomentosus	VCP	3	40.89372, -73.89106	7/7-7/15/15
1172	N. tomentosus	VCP	3	40.89372, -73.89106	7/7-7/15/15
1173	N. tomentosus	VCP	3	40.89372, -73.89106	7/7-7/15/15
1174	N. tomentosus	VCP	3	40.89372, -73.89106	7/7-7/15/15
1175	N. tomentosus	VCP	3	40.89372, -73.89106	7/7-7/15/15
1176	N. tomentosus	VCP	3	40.89372, -73.89106	7/7-7/15/15
1177	N. tomentosus	VCP	3	40.89372, -73.89106	7/7-7/15/15
1178	N. tomentosus	VCP	3	40.89372, -73.89106	7/7-7/15/15
1179	N. tomentosus	VCP	3	40.89372, -73.89106	7/7-7/15/15
1180	N. tomentosus	VCP	3	40.89372, -73.89106	7/7-7/15/15
1181	N. tomentosus	VCP	3	40.89372, -73.89106	7/7-7/15/15
1182	N. tomentosus	VCP	3	40.89372, -73.89106	7/7-7/15/15
1183	N. tomentosus	VCP	3	40.89372, -73.89106	7/7-7/15/15
1184	N. tomentosus	VCP	3	40.89372, -73.89106	7/7-7/15/15
1185	N. tomentosus	VCP	3	40.89372, -73.89106	7/7-7/15/15
1186	N. tomentosus	VCP	3	40.89372, -73.89106	7/7-7/15/15
1187	N. tomentosus	VCP	3	40.89372, -73.89106	7/7-7/15/15
1188	O. inequale	VCP	3	40.89372, -73.89106	7/7-7/15/15
1189	N. orbicollis	VCP	3	40.89372, -73.89106	7/7-7/15/15
1190	N. orbicollis	VCP	3	40.89372, -73.89106	7/7-7/15/15
1191	N. orbicollis	VCP	3	40.89372, -73.89106	7/7-7/15/15
1192	N. orbicollis	VCP	3	40.89372, -73.89106	7/7-7/15/15
1193	N. orbicollis	VCP	3	40.89372, -73.89106	7/7-7/15/15
1194	O. noveboracense	VCP	3	40.89372, -73.89106	7/7-7/15/15
1195	O. noveboracense	VCP	3	40.89372, -73.89106	7/7-7/15/15
1196	O. noveboracense	VCP	3	40.89372, -73.89106	7/7-7/15/15
1197	O. noveboracense	VCP	3	40.89372, -73.89106	7/7-7/15/15
1198	O. noveboracense	VCP	3	40.89372, -73.89106	7/7-7/15/15
1199	O. noveboracense	VCP	3	40.89372, -73.89106	7/7-7/15/15
1200	O. noveboracense	VCP	3	40.89372, -73.89106	7/7-7/15/15
1201	O. noveboracense	VCP	3	40.89372, -73.89106	7/7-7/15/15
1202	O. noveboracense	VCP	3	40.89372, -73.89106	7/7-7/15/15
1203	O. noveboracense	VCP	3	40.89372, -73.89106	7/7-7/15/15
1204	N. tomentosus	LCC_Trial2	1	41.12547, -73.73148	7/14-7/21/15
1205	N. tomentosus	LCC_Trial2	1	41.12547, -73.73148	7/14-7/21/15
1206	N. tomentosus	LCC_Trial2	1	41.12547, -73.73148	7/14-7/21/15
1207	N. tomentosus	LCC_Trial2	1	41.12547, -73.73148	7/14-7/21/15
1208	N. tomentosus	LCC_Trial2	1	41.12547, -73.73148	7/14-7/21/15
1209	N. tomentosus	LCC_Trial2	1	41.12547, -73.73148	7/14-7/21/15
1210	N. tomentosus	LCC_Trial2	1	41.12547, -73.73148	7/14-7/21/15
1211	N. tomentosus	LCC_Trial2	1	41.12547, -73.73148	7/14-7/21/15
1212	N. tomentosus	LCC_Trial2	1	41.12547, -73.73148	7/14-7/21/15
1213	N. tomentosus	LCC_Trial2	1	41.12547, -73.73148	7/14-7/21/15
1214	N. tomentosus	LCC_Trial2	1	41.12547, -73.73148	7/14-7/21/15
1215	N. tomentosus	LCC_Trial2	1	41.12547, -73.73148	7/14-7/21/15
1216	N. tomentosus	LCC_Trial2	1	41.12547, -73.73148	7/14-7/21/15
1217	N. tomentosus	LCC_Trial2	1	41.12547, -73.73148	7/14-7/21/15
1218	N. tomentosus	LCC_Trial2	1	41.12547, -73.73148	7/14-7/21/15
1219	N. tomentosus	LCC_Trial2	1	41.12547, -73.73148	7/14-7/21/15
1220	N. tomentosus	LCC_Trial2	1	41.12547, -73.73148	7/14-7/21/15
1221	N. tomentosus	LCC_Trial2	1	41.12547, -73.73148	7/14-7/21/15
1222	N. tomentosus	LCC_Trial2	1	41.12547, -73.73148	7/14-7/21/15
1223	N. tomentosus	LCC_Trial2	1	41.12547, -73.73148	7/14-7/21/15
1224	N. tomentosus	LCC_Trial2	1	41.12547, -73.73148	7/14-7/21/15
1225	N. tomentosus	LCC_Trial2	1	41.12547, -73.73148	7/14-7/21/15
1226	N. tomentosus	LCC_Trial2	1	41.12547, -73.73148	7/14-7/21/15
1227	N. tomentosus	LCC_Trial2	1	41.12547, -73.73148	7/14-7/21/15
1228	N. tomentosus	LCC_Trial2	1	41.12547, -73.73148	7/14-7/21/15
1229	N. tomentosus	LCC_Trial2	1	41.12547, -73.73148	7/14-7/21/15
1230	N. tomentosus	LCC_Trial2	1	41.12547, -73.73148	7/14-7/21/15
1231	N. tomentosus	LCC_Trial2	1	41.12547, -73.73148	7/14-7/21/15
1232	Necrophila americana	LCC_Trial2	1	41.12547, -73.73148	7/14-7/21/15
1233	Necrophila americana	LCC_Trial2	1	41.12547, -73.73148	7/14-7/21/15
1234	Necrophila americana	LCC_Trial2	1	41.12547, -73.73148	7/14-7/21/15
1235	Necrophila americana	LCC_Trial2	1	41.12547, -73.73148	7/14-7/21/15
1236	Necrophila americana	LCC_Trial2	1	41.12547, -73.73148	7/14-7/21/15
1237	Necrophila americana	LCC_Trial2	1	41.12547, -73.73148	7/14-7/21/15
1238	Necrophila americana	LCC_Trial2	1	41.12547, -73.73148	7/14-7/21/15
1239	Necrophila americana	LCC_Trial2	1	41.12547, -73.73148	7/14-7/21/15
1240	O. noveboracense	LCC_Trial2	1	41.12547, -73.73148	7/14-7/21/15
1241	O. noveboracense	LCC_Trial2	1	41.12547, -73.73148	7/14-7/21/15
1242	O. noveboracense	LCC_Trial2	1	41.12547, -73.73148	7/14-7/21/15
1243	O. noveboracense	LCC_Trial2	1	41.12547, -73.73148	7/14-7/21/15
1244	O. noveboracense	LCC_Trial2	1	41.12547, -73.73148	7/14-7/21/15
1245	O. noveboracense	LCC_Trial2	1	41.12547, -73.73148	7/14-7/21/15
1246	O. noveboracense	LCC_Trial2	1	41.12547, -73.73148	7/14-7/21/15
1247	O. noveboracense	LCC_Trial2	1	41.12547, -73.73148	7/14-7/21/15
1248	O. noveboracense	LCC_Trial2	1	41.12547, -73.73148	7/14-7/21/15
1249	O. noveboracense	LCC_Trial2	1	41.12547, -73.73148	7/14-7/21/15
1250	O. noveboracense	LCC_Trial2	1	41.12547, -73.73148	7/14-7/21/15
1251	O. noveboracense	LCC_Trial2	1	41.12547, -73.73148	7/14-7/21/15
1252	O. noveboracense	LCC_Trial2	1	41.12547, -73.73148	7/14-7/21/15
1253	O. noveboracense	LCC_Trial2	1	41.12547, -73.73148	7/14-7/21/15
1254	O. noveboracense	LCC_Trial2	1	41.12547, -73.73148	7/14-7/21/15
1255	O. noveboracense	LCC_Trial2	1	41.12547, -73.73148	7/14-7/21/15
1256	O. noveboracense	LCC_Trial2	1	41.12547, -73.73148	7/14-7/21/15
1257	O. noveboracense	LCC_Trial2	1	41.12547, -73.73148	7/14-7/21/15
1258	O. noveboracense	LCC_Trial2	1	41.12547, -73.73148	7/14-7/21/15
1259	O. noveboracense	LCC_Trial2	1	41.12547, -73.73148	7/14-7/21/15
1260	O. noveboracense	LCC_Trial2	1	41.12547, -73.73148	7/14-7/21/15
1261	O. noveboracense	LCC_Trial2	1	41.12547, -73.73148	7/14-7/21/15
1262	O. noveboracense	LCC_Trial2	1	41.12547, -73.73148	7/14-7/21/15
1263	O. noveboracense	LCC_Trial2	1	41.12547, -73.73148	7/14-7/21/15
1264	O. noveboracense	LCC_Trial2	1	41.12547, -73.73148	7/14-7/21/15
1265	N. orbicollis	LCC_Trial2	1	41.12547, -73.73148	7/14-7/21/15
1266	N. orbicollis	LCC_Trial2	1	41.12547, -73.73148	7/14-7/21/15
1267	N. orbicollis	LCC_Trial2	1	41.12547, -73.73148	7/14-7/21/15
1268	N. orbicollis	LCC_Trial2	1	41.12547, -73.73148	7/14-7/21/15
1269	N. tomentosus	LCC_Trial2	2	41.12987, -73.73183	7/14-7/21/15
1270	N. tomentosus	LCC_Trial2	2	41.12987, -73.73183	7/14-7/21/15
1271	N. tomentosus	LCC_Trial2	2	41.12987, -73.73183	7/14-7/21/15
1272	N. tomentosus	LCC_Trial2	2	41.12987, -73.73183	7/14-7/21/15
1273	N. tomentosus	LCC_Trial2	2	41.12987, -73.73183	7/14-7/21/15
1274	N. tomentosus	LCC_Trial2	2	41.12987, -73.73183	7/14-7/21/15
1275	N. tomentosus	LCC_Trial2	2	41.12987, -73.73183	7/14-7/21/15
1276	N. tomentosus	LCC_Trial2	2	41.12987, -73.73183	7/14-7/21/15
1277	N. tomentosus	LCC_Trial2	2	41.12987, -73.73183	7/14-7/21/15
1278	N. tomentosus	LCC_Trial2	2	41.12987, -73.73183	7/14-7/21/15
1279	N. tomentosus	LCC_Trial2	2	41.12987, -73.73183	7/14-7/21/15
1280	N. tomentosus	LCC_Trial2	2	41.12987, -73.73183	7/14-7/21/15
1281	N. tomentosus	LCC_Trial2	2	41.12987, -73.73183	7/14-7/21/15
1282	N. tomentosus	LCC_Trial2	2	41.12987, -73.73183	7/14-7/21/15
1283	N. tomentosus	LCC_Trial2	2	41.12987, -73.73183	7/14-7/21/15
1284	N. tomentosus	LCC_Trial2	2	41.12987, -73.73183	7/14-7/21/15
1285	N. tomentosus	LCC_Trial2	2	41.12987, -73.73183	7/14-7/21/15
1286	N. tomentosus	LCC_Trial2	2	41.12987, -73.73183	7/14-7/21/15
1287	N. tomentosus	LCC_Trial2	2	41.12987, -73.73183	7/14-7/21/15
1288	N. tomentosus	LCC_Trial2	2	41.12987, -73.73183	7/14-7/21/15
1289	N. tomentosus	LCC_Trial2	2	41.12987, -73.73183	7/14-7/21/15
1290	N. tomentosus	LCC_Trial2	2	41.12987, -73.73183	7/14-7/21/15
1291	N. tomentosus	LCC_Trial2	2	41.12987, -73.73183	7/14-7/21/15
1292	Necrophila americana	LCC_Trial2	2	41.12987, -73.73183	7/14-7/21/15
1293	N. orbicollis	LCC_Trial2	2	41.12987, -73.73183	7/14-7/21/15
1294	N. orbicollis	LCC_Trial2	2	41.12987, -73.73183	7/14-7/21/15
1295	N. orbicollis	LCC_Trial2	2	41.12987, -73.73183	7/14-7/21/15
1296	O. noveboracense	LCC_Trial2	2	41.12987, -73.73183	7/14-7/21/15
1297	O. noveboracense	LCC_Trial2	2	41.12987, -73.73183	7/14-7/21/15
1298	O. noveboracense	LCC_Trial2	2	41.12987, -73.73183	7/14-7/21/15
1299	N. orbicollis	LCC_Trial2	3	41.13003, -73.72993	7/14-7/21/15
1300	N. tomentosus	LCC_Trial2	3	41.13003, -73.72993	7/14-7/21/15
1301	N. tomentosus	LCC_Trial2	3	41.13003, -73.72993	7/14-7/21/15
1302	N. tomentosus	LCC_Trial2	3	41.13003, -73.72993	7/14-7/21/15
1303	O. noveboracense	RSP	1	41.10911, -73.84105	7/16-7/23/15
1304	N. orbicollis	RSP	1	41.10911, -73.84105	7/16-7/23/15
1305	N. orbicollis	RSP	1	41.10911, -73.84105	7/16-7/23/15
1306	N. tomentosus	RSP	1	41.10911, -73.84105	7/16-7/23/15
1307	N. tomentosus	RSP	1	41.10911, -73.84105	7/16-7/23/15
1308	N. tomentosus	RSP	1	41.10911, -73.84105	7/16-7/23/15
1309	N. tomentosus	RSP	1	41.10911, -73.84105	7/16-7/23/15
1310	N. tomentosus	RSP	1	41.10911, -73.84105	7/16-7/23/15
1311	N. tomentosus	RSP	1	41.10911, -73.84105	7/16-7/23/15
1312	N. tomentosus	RSP	1	41.10911, -73.84105	7/16-7/23/15
1313	N. tomentosus	RSP	1	41.10911, -73.84105	7/16-7/23/15
1314	N. tomentosus	RSP	1	41.10911, -73.84105	7/16-7/23/15
1315	N. tomentosus	RSP	1	41.10911, -73.84105	7/16-7/23/15
1316	N. tomentosus	RSP	1	41.10911, -73.84105	7/16-7/23/15
1317	N. tomentosus	RSP	1	41.10911, -73.84105	7/16-7/23/15
1318	N. tomentosus	RSP	1	41.10911, -73.84105	7/16-7/23/15
1319	N. tomentosus	RSP	1	41.10911, -73.84105	7/16-7/23/15
1320	N. tomentosus	RSP	1	41.10911, -73.84105	7/16-7/23/15
1321	N. tomentosus	RSP	1	41.10911, -73.84105	7/16-7/23/15
1322	N. tomentosus	RSP	1	41.10911, -73.84105	7/16-7/23/15
1323	N. tomentosus	RSP	1	41.10911, -73.84105	7/16-7/23/15
1324	N. tomentosus	RSP	1	41.10911, -73.84105	7/16-7/23/15
1325	N. tomentosus	RSP	1	41.10911, -73.84105	7/16-7/23/15
1326	N. tomentosus	RSP	1	41.10911, -73.84105	7/16-7/23/15
1327	N. tomentosus	RSP	1	41.10911, -73.84105	7/16-7/23/15
1328	N. tomentosus	RSP	1	41.10911, -73.84105	7/16-7/23/15
1329	N. tomentosus	RSP	1	41.10911, -73.84105	7/16-7/23/15
1330	N. tomentosus	RSP	1	41.10911, -73.84105	7/16-7/23/15
1331	N. tomentosus	RSP	1	41.10911, -73.84105	7/16-7/23/15
1332	N. tomentosus	RSP	1	41.10911, -73.84105	7/16-7/23/15
1333	N. tomentosus	RSP	1	41.10911, -73.84105	7/16-7/23/15
1334	N. tomentosus	RSP	1	41.10911, -73.84105	7/16-7/23/15
1335	N. tomentosus	RSP	1	41.10911, -73.84105	7/16-7/23/15
1336	N. tomentosus	RSP	1	41.10911, -73.84105	7/16-7/23/15
1337	N. tomentosus	RSP	1	41.10911, -73.84105	7/16-7/23/15
1338	N. tomentosus	RSP	1	41.10911, -73.84105	7/16-7/23/15
1339	N. tomentosus	RSP	1	41.10911, -73.84105	7/16-7/23/15
1340	N. tomentosus	RSP	1	41.10911, -73.84105	7/16-7/23/15
1341	N. tomentosus	RSP	1	41.10911, -73.84105	7/16-7/23/15
1342	N. tomentosus	RSP	1	41.10911, -73.84105	7/16-7/23/15
1343	N. tomentosus	RSP	1	41.10911, -73.84105	7/16-7/23/15
1344	N. tomentosus	RSP	1	41.10911, -73.84105	7/16-7/23/15
1345	N. tomentosus	RSP	1	41.10911, -73.84105	7/16-7/23/15
1346	N. tomentosus	RSP	1	41.10911, -73.84105	7/16-7/23/15
1347	N. tomentosus	RSP	1	41.10911, -73.84105	7/16-7/23/15
1348	N. tomentosus	RSP	1	41.10911, -73.84105	7/16-7/23/15
1349	N. tomentosus	RSP	1	41.10911, -73.84105	7/16-7/23/15
1350	Necrophila americana	RSP	1	41.10911, -73.84105	7/16-7/23/15
1351	Necrophila americana	RSP	1	41.10911, -73.84105	7/16-7/23/15
1352	Necrophila americana	RSP	1	41.10911, -73.84105	7/16-7/23/15
1353	Necrophila americana	RSP	1	41.10911, -73.84105	7/16-7/23/15
1354	Necrophila americana	RSP	1	41.10911, -73.84105	7/16-7/23/15
1355	Necrophila americana	RSP	1	41.10911, -73.84105	7/16-7/23/15
1356	Necrophila americana	RSP	1	41.10911, -73.84105	7/16-7/23/15
1357	Necrophila americana	RSP	1	41.10911, -73.84105	7/16-7/23/15
1358	Necrophila americana	RSP	1	41.10911, -73.84105	7/16-7/23/15
1359	Necrophila americana	RSP	1	41.10911, -73.84105	7/16-7/23/15
1360	Necrophila americana	RSP	1	41.10911, -73.84105	7/16-7/23/15
1361	Necrophila americana	RSP	1	41.10911, -73.84105	7/16-7/23/15
1362	Necrophila americana	RSP	1	41.10911, -73.84105	7/16-7/23/15
1363	Necrophila americana	RSP	1	41.10911, -73.84105	7/16-7/23/15
1364	Necrophila americana	RSP	1	41.10911, -73.84105	7/16-7/23/15
1365	Necrophila americana	RSP	1	41.10911, -73.84105	7/16-7/23/15
1366	Necrophila americana	RSP	1	41.10911, -73.84105	7/16-7/23/15
1367	Necrophila americana	RSP	1	41.10911, -73.84105	7/16-7/23/15
1368	Necrophila americana	RSP	1	41.10911, -73.84105	7/16-7/23/15
1369	Necrophila americana	RSP	1	41.10911, -73.84105	7/16-7/23/15
1370	Necrophila americana	RSP	1	41.10911, -73.84105	7/16-7/23/15
1371	O. noveboracense	RSP	2	41.10668, -73.84367	7/16-7/23/15
1372	O. noveboracense	RSP	2	41.10668, -73.84367	7/16-7/23/15
1373	O. noveboracense	RSP	2	41.10668, -73.84367	7/16-7/23/15
1374	O. noveboracense	RSP	2	41.10668, -73.84367	7/16-7/23/15
1375	O. noveboracense	RSP	2	41.10668, -73.84367	7/16-7/23/15
1376	O. noveboracense	RSP	2	41.10668, -73.84367	7/16-7/23/15
1377	N. orbicollis	RSP	2	41.10668, -73.84367	7/16-7/23/15
1378	N. orbicollis	RSP	2	41.10668, -73.84367	7/16-7/23/15
1379	N. orbicollis	RSP	2	41.10668, -73.84367	7/16-7/23/15
1380	N. orbicollis	RSP	2	41.10668, -73.84367	7/16-7/23/15
1381	N. orbicollis	RSP	2	41.10668, -73.84367	7/16-7/23/15
1382	N. orbicollis	RSP	2	41.10668, -73.84367	7/16-7/23/15
1383	N. orbicollis	RSP	2	41.10668, -73.84367	7/16-7/23/15
1384	N. orbicollis	RSP	2	41.10668, -73.84367	7/16-7/23/15
1385	N. orbicollis	RSP	2	41.10668, -73.84367	7/16-7/23/15
1386	N. orbicollis	RSP	2	41.10668, -73.84367	7/16-7/23/15
1387	N. orbicollis	RSP	2	41.10668, -73.84367	7/16-7/23/15
1388	N. orbicollis	RSP	2	41.10668, -73.84367	7/16-7/23/15
1389	N. orbicollis	RSP	2	41.10668, -73.84367	7/16-7/23/15
1390	N. orbicollis	RSP	2	41.10668, -73.84367	7/16-7/23/15
1391	N. orbicollis	RSP	2	41.10668, -73.84367	7/16-7/23/15
1392	N. orbicollis	RSP	2	41.10668, -73.84367	7/16-7/23/15
1393	N. orbicollis	RSP	2	41.10668, -73.84367	7/16-7/23/15
1394	N. orbicollis	RSP	2	41.10668, -73.84367	7/16-7/23/15
1395	N. orbicollis	RSP	2	41.10668, -73.84367	7/16-7/23/15
1396	N. orbicollis	RSP	2	41.10668, -73.84367	7/16-7/23/15
1397	N. orbicollis	RSP	2	41.10668, -73.84367	7/16-7/23/15
1398	N. orbicollis	RSP	2	41.10668, -73.84367	7/16-7/23/15
1399	N. orbicollis	RSP	2	41.10668, -73.84367	7/16-7/23/15
1400	N. orbicollis	RSP	2	41.10668, -73.84367	7/16-7/23/15
1401	N. orbicollis	RSP	2	41.10668, -73.84367	7/16-7/23/15
1402	N. orbicollis	RSP	2	41.10668, -73.84367	7/16-7/23/15
1403	N. orbicollis	RSP	2	41.10668, -73.84367	7/16-7/23/15
1404	N. orbicollis	RSP	2	41.10668, -73.84367	7/16-7/23/15
1405	N. orbicollis	RSP	2	41.10668, -73.84367	7/16-7/23/15
1406	N. orbicollis	RSP	2	41.10668, -73.84367	7/16-7/23/15
1407	N. orbicollis	RSP	2	41.10668, -73.84367	7/16-7/23/15
1408	N. orbicollis	RSP	2	41.10668, -73.84367	7/16-7/23/15
1409	N. orbicollis	RSP	2	41.10668, -73.84367	7/16-7/23/15
1410	N. tomentosus	RSP	2	41.10668, -73.84367	7/16-7/23/15
1411	N. tomentosus	RSP	2	41.10668, -73.84367	7/16-7/23/15
1412	N. tomentosus	RSP	2	41.10668, -73.84367	7/16-7/23/15
1413	N. tomentosus	RSP	2	41.10668, -73.84367	7/16-7/23/15
1414	N. tomentosus	RSP	2	41.10668, -73.84367	7/16-7/23/15
1415	N. tomentosus	RSP	2	41.10668, -73.84367	7/16-7/23/15
1416	N. tomentosus	RSP	2	41.10668, -73.84367	7/16-7/23/15
1417	N. tomentosus	RSP	2	41.10668, -73.84367	7/16-7/23/15
1418	N. tomentosus	RSP	2	41.10668, -73.84367	7/16-7/23/15
1419	N. tomentosus	RSP	2	41.10668, -73.84367	7/16-7/23/15
1420	N. tomentosus	RSP	2	41.10668, -73.84367	7/16-7/23/15
1421	N. tomentosus	RSP	2	41.10668, -73.84367	7/16-7/23/15
1422	N. tomentosus	RSP	2	41.10668, -73.84367	7/16-7/23/15
1423	N. tomentosus	RSP	2	41.10668, -73.84367	7/16-7/23/15
1424	N. tomentosus	RSP	2	41.10668, -73.84367	7/16-7/23/15
1425	N. tomentosus	RSP	2	41.10668, -73.84367	7/16-7/23/15
1426	N. tomentosus	RSP	2	41.10668, -73.84367	7/16-7/23/15
1427	N. tomentosus	RSP	2	41.10668, -73.84367	7/16-7/23/15
1428	N. tomentosus	RSP	2	41.10668, -73.84367	7/16-7/23/15
1429	N. tomentosus	RSP	2	41.10668, -73.84367	7/16-7/23/15
1430	N. tomentosus	RSP	2	41.10668, -73.84367	7/16-7/23/15
1431	N. tomentosus	RSP	2	41.10668, -73.84367	7/16-7/23/15
1432	N. tomentosus	RSP	2	41.10668, -73.84367	7/16-7/23/15
1433	N. tomentosus	RSP	2	41.10668, -73.84367	7/16-7/23/15
1434	N. tomentosus	RSP	2	41.10668, -73.84367	7/16-7/23/15
1435	N. tomentosus	RSP	2	41.10668, -73.84367	7/16-7/23/15
1436	N. tomentosus	RSP	2	41.10668, -73.84367	7/16-7/23/15
1437	N. tomentosus	RSP	2	41.10668, -73.84367	7/16-7/23/15
1438	N. tomentosus	RSP	2	41.10668, -73.84367	7/16-7/23/15
1439	N. tomentosus	RSP	2	41.10668, -73.84367	7/16-7/23/15
1440	N. tomentosus	RSP	2	41.10668, -73.84367	7/16-7/23/15
1441	N. tomentosus	RSP	2	41.10668, -73.84367	7/16-7/23/15
1442	N. tomentosus	RSP	2	41.10668, -73.84367	7/16-7/23/15
1443	N. tomentosus	RSP	2	41.10668, -73.84367	7/16-7/23/15
1444	N. tomentosus	RSP	2	41.10668, -73.84367	7/16-7/23/15
1445	N. tomentosus	RSP	2	41.10668, -73.84367	7/16-7/23/15
1446	N. tomentosus	RSP	2	41.10668, -73.84367	7/16-7/23/15
1447	N. tomentosus	RSP	2	41.10668, -73.84367	7/16-7/23/15
1448	N. tomentosus	RSP	2	41.10668, -73.84367	7/16-7/23/15
1449	N. tomentosus	RSP	2	41.10668, -73.84367	7/16-7/23/15
1450	N. tomentosus	RSP	2	41.10668, -73.84367	7/16-7/23/15
1451	N. tomentosus	RSP	2	41.10668, -73.84367	7/16-7/23/15
1452	N. tomentosus	RSP	2	41.10668, -73.84367	7/16-7/23/15
1453	N. tomentosus	RSP	2	41.10668, -73.84367	7/16-7/23/15
1454	N. tomentosus	RSP	2	41.10668, -73.84367	7/16-7/23/15
1455	N. tomentosus	RSP	2	41.10668, -73.84367	7/16-7/23/15
1456	N. tomentosus	RSP	2	41.10668, -73.84367	7/16-7/23/15
1457	N. tomentosus	RSP	2	41.10668, -73.84367	7/16-7/23/15
1458	N. tomentosus	RSP	2	41.10668, -73.84367	7/16-7/23/15
1459	N. tomentosus	RSP	2	41.10668, -73.84367	7/16-7/23/15
1460	N. tomentosus	RSP	2	41.10668, -73.84367	7/16-7/23/15
1461	N. tomentosus	RSP	2	41.10668, -73.84367	7/16-7/23/15
1462	N. tomentosus	RSP	2	41.10668, -73.84367	7/16-7/23/15
1463	N. tomentosus	RSP	2	41.10668, -73.84367	7/16-7/23/15
1464	N. tomentosus	RSP	2	41.10668, -73.84367	7/16-7/23/15
1465	N. tomentosus	RSP	2	41.10668, -73.84367	7/16-7/23/15
1466	N. tomentosus	RSP	2	41.10668, -73.84367	7/16-7/23/15
1467	N. tomentosus	RSP	2	41.10668, -73.84367	7/16-7/23/15
1468	N. tomentosus	RSP	2	41.10668, -73.84367	7/16-7/23/15
1469	N. tomentosus	RSP	2	41.10668, -73.84367	7/16-7/23/15
1470	N. tomentosus	RSP	2	41.10668, -73.84367	7/16-7/23/15
1471	N. tomentosus	RSP	2	41.10668, -73.84367	7/16-7/23/15
1472	N. tomentosus	RSP	2	41.10668, -73.84367	7/16-7/23/15
1473	N. tomentosus	RSP	2	41.10668, -73.84367	7/16-7/23/15
1474	N. tomentosus	RSP	2	41.10668, -73.84367	7/16-7/23/15
1475	N. tomentosus	RSP	2	41.10668, -73.84367	7/16-7/23/15
1476	N. tomentosus	RSP	2	41.10668, -73.84367	7/16-7/23/15
1477	N. tomentosus	RSP	2	41.10668, -73.84367	7/16-7/23/15
1478	N. tomentosus	RSP	2	41.10668, -73.84367	7/16-7/23/15
1479	Necrophila americana	RSP	2	41.10668, -73.84367	7/16-7/23/15
1480	Necrophila americana	RSP	2	41.10668, -73.84367	7/16-7/23/15
1481	Necrophila americana	RSP	2	41.10668, -73.84367	7/16-7/23/15
1482	Necrophila americana	RSP	2	41.10668, -73.84367	7/16-7/23/15
1483	Necrophila americana	RSP	2	41.10668, -73.84367	7/16-7/23/15
1484	Necrophila americana	RSP	2	41.10668, -73.84367	7/16-7/23/15
1485	Necrophila americana	RSP	2	41.10668, -73.84367	7/16-7/23/15
1486	Necrophila americana	RSP	2	41.10668, -73.84367	7/16-7/23/15
1487	Necrophila americana	RSP	2	41.10668, -73.84367	7/16-7/23/15
1488	Necrophila americana	RSP	2	41.10668, -73.84367	7/16-7/23/15
1489	Necrophila americana	RSP	2	41.10668, -73.84367	7/16-7/23/15
1490	Necrophila americana	RSP	2	41.10668, -73.84367	7/16-7/23/15
1491	Necrophila americana	RSP	2	41.10668, -73.84367	7/16-7/23/15
1492	Necrophila americana	RSP	2	41.10668, -73.84367	7/16-7/23/15
1493	Necrophila americana	RSP	2	41.10668, -73.84367	7/16-7/23/15
1494	Necrophila americana	RSP	2	41.10668, -73.84367	7/16-7/23/15
1495	Necrophila americana	RSP	2	41.10668, -73.84367	7/16-7/23/15
1496	Necrophila americana	RSP	2	41.10668, -73.84367	7/16-7/23/15
1497	Necrophila americana	RSP	2	41.10668, -73.84367	7/16-7/23/15
1498	Necrophila americana	RSP	2	41.10668, -73.84367	7/16-7/23/15
1499	Necrophila americana	RSP	2	41.10668, -73.84367	7/16-7/23/15
1500	Necrophila americana	RSP	2	41.10668, -73.84367	7/16-7/23/15
1501	Necrophila americana	RSP	2	41.10668, -73.84367	7/16-7/23/15
1502	Necrophila americana	RSP	2	41.10668, -73.84367	7/16-7/23/15
1503	Necrophila americana	RSP	2	41.10668, -73.84367	7/16-7/23/15
1504	Necrophila americana	RSP	2	41.10668, -73.84367	7/16-7/23/15
1505	N. orbicollis	RSP	3	41.10726, -73.84797	7/16-7/23/15
1506	N. orbicollis	RSP	3	41.10726, -73.84797	7/16-7/23/15
1507	N. orbicollis	RSP	3	41.10726, -73.84797	7/16-7/23/15
1508	N. orbicollis	RSP	3	41.10726, -73.84797	7/16-7/23/15
1509	N. orbicollis	RSP	3	41.10726, -73.84797	7/16-7/23/15
1510	N. orbicollis	RSP	3	41.10726, -73.84797	7/16-7/23/15
1511	N. orbicollis	RSP	3	41.10726, -73.84797	7/16-7/23/15
1512	N. orbicollis	RSP	3	41.10726, -73.84797	7/16-7/23/15
1513	N. orbicollis	RSP	3	41.10726, -73.84797	7/16-7/23/15
1514	N. orbicollis	RSP	3	41.10726, -73.84797	7/16-7/23/15
1515	N. orbicollis	RSP	3	41.10726, -73.84797	7/16-7/23/15
1516	N. orbicollis	RSP	3	41.10726, -73.84797	7/16-7/23/15
1517	N. orbicollis	RSP	3	41.10726, -73.84797	7/16-7/23/15
1518	N. orbicollis	RSP	3	41.10726, -73.84797	7/16-7/23/15
1519	N. orbicollis	RSP	3	41.10726, -73.84797	7/16-7/23/15
1520	N. tomentosus	RSP	3	41.10726, -73.84797	7/16-7/23/15
1521	N. tomentosus	RSP	3	41.10726, -73.84797	7/16-7/23/15
1522	N. tomentosus	RSP	3	41.10726, -73.84797	7/16-7/23/15
1523	N. tomentosus	RSP	3	41.10726, -73.84797	7/16-7/23/15
1524	N. tomentosus	RSP	3	41.10726, -73.84797	7/16-7/23/15
1525	N. tomentosus	RSP	3	41.10726, -73.84797	7/16-7/23/15
1526	N. tomentosus	RSP	3	41.10726, -73.84797	7/16-7/23/15
1527	N. tomentosus	RSP	3	41.10726, -73.84797	7/16-7/23/15
1528	N. tomentosus	RSP	3	41.10726, -73.84797	7/16-7/23/15
1529	N. tomentosus	RSP	3	41.10726, -73.84797	7/16-7/23/15
1530	N. tomentosus	RSP	3	41.10726, -73.84797	7/16-7/23/15
1531	N. tomentosus	RSP	3	41.10726, -73.84797	7/16-7/23/15
1532	N. tomentosus	RSP	3	41.10726, -73.84797	7/16-7/23/15
1533	N. tomentosus	RSP	3	41.10726, -73.84797	7/16-7/23/15
1534	N. tomentosus	RSP	3	41.10726, -73.84797	7/16-7/23/15
1535	N. tomentosus	RSP	3	41.10726, -73.84797	7/16-7/23/15
1536	N. tomentosus	RSP	3	41.10726, -73.84797	7/16-7/23/15
1537	N. tomentosus	RSP	3	41.10726, -73.84797	7/16-7/23/15
1538	N. tomentosus	RSP	3	41.10726, -73.84797	7/16-7/23/15
1539	N. tomentosus	RSP	3	41.10726, -73.84797	7/16-7/23/15
1540	N. tomentosus	RSP	3	41.10726, -73.84797	7/16-7/23/15
1541	N. tomentosus	RSP	3	41.10726, -73.84797	7/16-7/23/15
1542	N. tomentosus	RSP	3	41.10726, -73.84797	7/16-7/23/15
1543	N. tomentosus	RSP	3	41.10726, -73.84797	7/16-7/23/15
1544	N. tomentosus	RSP	3	41.10726, -73.84797	7/16-7/23/15
1545	N. tomentosus	RSP	3	41.10726, -73.84797	7/16-7/23/15
1546	N. tomentosus	RSP	3	41.10726, -73.84797	7/16-7/23/15
1547	N. tomentosus	RSP	3	41.10726, -73.84797	7/16-7/23/15
1548	N. tomentosus	RSP	3	41.10726, -73.84797	7/16-7/23/15
1549	N. tomentosus	RSP	3	41.10726, -73.84797	7/16-7/23/15
1550	N. tomentosus	RSP	3	41.10726, -73.84797	7/16-7/23/15
1551	N. tomentosus	RSP	3	41.10726, -73.84797	7/16-7/23/15
1552	N. tomentosus	RSP	3	41.10726, -73.84797	7/16-7/23/15
1553	N. tomentosus	RSP	3	41.10726, -73.84797	7/16-7/23/15
1554	N. tomentosus	RSP	3	41.10726, -73.84797	7/16-7/23/15
1555	N. tomentosus	RSP	3	41.10726, -73.84797	7/16-7/23/15
1556	N. tomentosus	RSP	3	41.10726, -73.84797	7/16-7/23/15
1557	N. tomentosus	RSP	3	41.10726, -73.84797	7/16-7/23/15
1558	N. tomentosus	RSP	3	41.10726, -73.84797	7/16-7/23/15
1559	N. tomentosus	RSP	3	41.10726, -73.84797	7/16-7/23/15
1560	N. tomentosus	RSP	3	41.10726, -73.84797	7/16-7/23/15
1561	N. tomentosus	RSP	3	41.10726, -73.84797	7/16-7/23/15
1562	N. tomentosus	RSP	3	41.10726, -73.84797	7/16-7/23/15
1563	N. tomentosus	RSP	3	41.10726, -73.84797	7/16-7/23/15
1564	N. tomentosus	RSP	3	41.10726, -73.84797	7/16-7/23/15
1565	N. tomentosus	RSP	3	41.10726, -73.84797	7/16-7/23/15
1566	N. tomentosus	RSP	3	41.10726, -73.84797	7/16-7/23/15
1567	N. tomentosus	RSP	3	41.10726, -73.84797	7/16-7/23/15
1568	N. tomentosus	RSP	3	41.10726, -73.84797	7/16-7/23/15
1569	N. tomentosus	RSP	3	41.10726, -73.84797	7/16-7/23/15
1570	N. tomentosus	RSP	3	41.10726, -73.84797	7/16-7/23/15
1571	N. tomentosus	RSP	3	41.10726, -73.84797	7/16-7/23/15
1572	N. tomentosus	RSP	3	41.10726, -73.84797	7/16-7/23/15
1573	N. tomentosus	RSP	3	41.10726, -73.84797	7/16-7/23/15
1574	N. tomentosus	RSP	3	41.10726, -73.84797	7/16-7/23/15
1575	N. tomentosus	RSP	3	41.10726, -73.84797	7/16-7/23/15
1576	N. tomentosus	RSP	3	41.10726, -73.84797	7/16-7/23/15
1577	N. tomentosus	RSP	3	41.10726, -73.84797	7/16-7/23/15
1578	N. tomentosus	RSP	3	41.10726, -73.84797	7/16-7/23/15
1579	N. tomentosus	RSP	3	41.10726, -73.84797	7/16-7/23/15
1580	N. tomentosus	RSP	3	41.10726, -73.84797	7/16-7/23/15
1581	N. tomentosus	RSP	3	41.10726, -73.84797	7/16-7/23/15
1582	N. tomentosus	RSP	3	41.10726, -73.84797	7/16-7/23/15
1583	N. tomentosus	RSP	3	41.10726, -73.84797	7/16-7/23/15
1584	N. tomentosus	RSP	3	41.10726, -73.84797	7/16-7/23/15
1585	N. tomentosus	RSP	3	41.10726, -73.84797	7/16-7/23/15
1586	N. tomentosus	RSP	3	41.10726, -73.84797	7/16-7/23/15
1587	N. tomentosus	RSP	3	41.10726, -73.84797	7/16-7/23/15
1588	N. tomentosus	RSP	3	41.10726, -73.84797	7/16-7/23/15
1589	Necrophila americana	RSP	3	41.10726, -73.84797	7/16-7/23/15
1590	Necrophila americana	RSP	3	41.10726, -73.84797	7/16-7/23/15
1591	Necrophila americana	RSP	3	41.10726, -73.84797	7/16-7/23/15
1592	Necrophila americana	RSP	3	41.10726, -73.84797	7/16-7/23/15
1593	Necrophila americana	RSP	3	41.10726, -73.84797	7/16-7/23/15
1594	Necrophila americana	RSP	3	41.10726, -73.84797	7/16-7/23/15
1595	O. noveboracense	RSP	3	41.10726, -73.84797	7/16-7/23/15
1596	O. noveboracense	RSP	3	41.10726, -73.84797	7/16-7/23/15
1597	O. noveboracense	RSP	3	41.10726, -73.84797	7/16-7/23/15
1598	O. noveboracense	RSP	3	41.10726, -73.84797	7/16-7/23/15
1599	N. defodiens	RSP	3	41.10726, -73.84797	7/16-7/23/15
1600	N. defodiens	RSP	3	41.10726, -73.84797	7/16-7/23/15
1601	N. orbicollis	MH	1	41.78711, -73.3821	7/21-7/28/15
1602	N. orbicollis	MH	1	41.78711, -73.3821	7/21-7/28/15
1603	N. orbicollis	MH	1	41.78711, -73.3821	7/21-7/28/15
1604	N. orbicollis	MH	1	41.78711, -73.3821	7/21-7/28/15
1605	N. orbicollis	MH	1	41.78711, -73.3821	7/21-7/28/15
1606	N. orbicollis	MH	1	41.78711, -73.3821	7/21-7/28/15
1607	N. orbicollis	MH	1	41.78711, -73.3821	7/21-7/28/15
1608	N. orbicollis	MH	1	41.78711, -73.3821	7/21-7/28/15
1609	N. orbicollis	MH	1	41.78711, -73.3821	7/21-7/28/15
1610	N. orbicollis	MH	1	41.78711, -73.3821	7/21-7/28/15
1611	O. noveboracense	MH	1	41.78711, -73.3821	7/21-7/28/15
1612	O. noveboracense	MH	1	41.78711, -73.3821	7/21-7/28/15
1613	N. defodiens	MH	1	41.78711, -73.3821	7/21-7/28/15
1614	N. defodiens	MH	1	41.78711, -73.3821	7/21-7/28/15
1615	N. defodiens	MH	1	41.78711, -73.3821	7/21-7/28/15
1616	N. defodiens	MH	1	41.78711, -73.3821	7/21-7/28/15
1617	N. defodiens	MH	1	41.78711, -73.3821	7/21-7/28/15
1618	N. defodiens	MH	1	41.78711, -73.3821	7/21-7/28/15
1619	N. defodiens	MH	1	41.78711, -73.3821	7/21-7/28/15
1620	N. tomentosus	MH	1	41.78711, -73.3821	7/21-7/28/15
1621	N. tomentosus	MH	1	41.78711, -73.3821	7/21-7/28/15
1622	N. tomentosus	MH	1	41.78711, -73.3821	7/21-7/28/15
1623	N. tomentosus	MH	1	41.78711, -73.3821	7/21-7/28/15
1624	N. tomentosus	MH	1	41.78711, -73.3821	7/21-7/28/15
1625	N. tomentosus	MH	1	41.78711, -73.3821	7/21-7/28/15
1626	N. tomentosus	MH	1	41.78711, -73.3821	7/21-7/28/15
1627	N. tomentosus	MH	1	41.78711, -73.3821	7/21-7/28/15
1628	N. tomentosus	MH	1	41.78711, -73.3821	7/21-7/28/15
1629	N. tomentosus	MH	1	41.78711, -73.3821	7/21-7/28/15
1630	N. tomentosus	MH	1	41.78711, -73.3821	7/21-7/28/15
1631	N. tomentosus	MH	1	41.78711, -73.3821	7/21-7/28/15
1632	N. tomentosus	MH	1	41.78711, -73.3821	7/21-7/28/15
1633	N. tomentosus	MH	1	41.78711, -73.3821	7/21-7/28/15
1634	N. tomentosus	MH	1	41.78711, -73.3821	7/21-7/28/15
1635	N. tomentosus	MH	1	41.78711, -73.3821	7/21-7/28/15
1636	N. tomentosus	MH	1	41.78711, -73.3821	7/21-7/28/15
1637	N. tomentosus	MH	1	41.78711, -73.3821	7/21-7/28/15
1638	N. tomentosus	MH	1	41.78711, -73.3821	7/21-7/28/15
1639	N. tomentosus	MH	1	41.78711, -73.3821	7/21-7/28/15
1640	N. tomentosus	MH	1	41.78711, -73.3821	7/21-7/28/15
1641	N. tomentosus	MH	1	41.78711, -73.3821	7/21-7/28/15
1642	N. tomentosus	MH	1	41.78711, -73.3821	7/21-7/28/15
1643	N. tomentosus	MH	1	41.78711, -73.3821	7/21-7/28/15
1644	N. tomentosus	MH	1	41.78711, -73.3821	7/21-7/28/15
1645	N. tomentosus	MH	1	41.78711, -73.3821	7/21-7/28/15
1646	N. tomentosus	MH	1	41.78711, -73.3821	7/21-7/28/15
1647	N. tomentosus	MH	1	41.78711, -73.3821	7/21-7/28/15
1648	N. tomentosus	MH	1	41.78711, -73.3821	7/21-7/28/15
1649	N. tomentosus	MH	1	41.78711, -73.3821	7/21-7/28/15
1650	N. tomentosus	MH	1	41.78711, -73.3821	7/21-7/28/15
1651	N. tomentosus	MH	1	41.78711, -73.3821	7/21-7/28/15
1652	N. tomentosus	MH	1	41.78711, -73.3821	7/21-7/28/15
1653	N. tomentosus	MH	1	41.78711, -73.3821	7/21-7/28/15
1654	N. tomentosus	MH	1	41.78711, -73.3821	7/21-7/28/15
1655	N. tomentosus	MH	1	41.78711, -73.3821	7/21-7/28/15
1656	N. tomentosus	MH	1	41.78711, -73.3821	7/21-7/28/15
1657	N. tomentosus	MH	1	41.78711, -73.3821	7/21-7/28/15
1658	N. tomentosus	MH	1	41.78711, -73.3821	7/21-7/28/15
1659	N. tomentosus	MH	1	41.78711, -73.3821	7/21-7/28/15
1660	N. tomentosus	MH	1	41.78711, -73.3821	7/21-7/28/15
1661	N. tomentosus	MH	1	41.78711, -73.3821	7/21-7/28/15
1662	N. tomentosus	MH	1	41.78711, -73.3821	7/21-7/28/15
1663	N. tomentosus	MH	1	41.78711, -73.3821	7/21-7/28/15
1664	N. tomentosus	MH	1	41.78711, -73.3821	7/21-7/28/15
1665	N. tomentosus	MH	1	41.78711, -73.3821	7/21-7/28/15
1666	N. tomentosus	MH	1	41.78711, -73.3821	7/21-7/28/15
1667	N. tomentosus	MH	1	41.78711, -73.3821	7/21-7/28/15
1668	N. tomentosus	MH	1	41.78711, -73.3821	7/21-7/28/15
1669	N. tomentosus	MH	1	41.78711, -73.3821	7/21-7/28/15
1670	N. tomentosus	MH	1	41.78711, -73.3821	7/21-7/28/15
1671	N. tomentosus	MH	1	41.78711, -73.3821	7/21-7/28/15
1672	N. tomentosus	MH	1	41.78711, -73.3821	7/21-7/28/15
1673	N. tomentosus	MH	1	41.78711, -73.3821	7/21-7/28/15
1674	N. tomentosus	MH	1	41.78711, -73.3821	7/21-7/28/15
1675	N. tomentosus	MH	1	41.78711, -73.3821	7/21-7/28/15
1676	N. tomentosus	MH	1	41.78711, -73.3821	7/21-7/28/15
1677	N. tomentosus	MH	1	41.78711, -73.3821	7/21-7/28/15
1678	N. tomentosus	MH	1	41.78711, -73.3821	7/21-7/28/15
1679	N. tomentosus	MH	1	41.78711, -73.3821	7/21-7/28/15
1680	N. tomentosus	MH	1	41.78711, -73.3821	7/21-7/28/15
1681	N. tomentosus	MH	1	41.78711, -73.3821	7/21-7/28/15
1682	N. tomentosus	MH	1	41.78711, -73.3821	7/21-7/28/15
1683	N. tomentosus	MH	1	41.78711, -73.3821	7/21-7/28/15
1684	N. tomentosus	MH	1	41.78711, -73.3821	7/21-7/28/15
1685	N. tomentosus	MH	1	41.78711, -73.3821	7/21-7/28/15
1686	N. tomentosus	MH	1	41.78711, -73.3821	7/21-7/28/15
1687	N. tomentosus	MH	1	41.78711, -73.3821	7/21-7/28/15
1688	N. tomentosus	MH	1	41.78711, -73.3821	7/21-7/28/15
1689	N. tomentosus	MH	1	41.78711, -73.3821	7/21-7/28/15
1690	N. tomentosus	MH	1	41.78711, -73.3821	7/21-7/28/15
1691	N. tomentosus	MH	1	41.78711, -73.3821	7/21-7/28/15
1692	N. tomentosus	MH	1	41.78711, -73.3821	7/21-7/28/15
1693	N. tomentosus	MH	1	41.78711, -73.3821	7/21-7/28/15
1694	N. tomentosus	MH	1	41.78711, -73.3821	7/21-7/28/15
1695	N. tomentosus	MH	1	41.78711, -73.3821	7/21-7/28/15
1696	N. tomentosus	MH	1	41.78711, -73.3821	7/21-7/28/15
1697	N. tomentosus	MH	1	41.78711, -73.3821	7/21-7/28/15
1698	N. tomentosus	MH	1	41.78711, -73.3821	7/21-7/28/15
1699	N. tomentosus	MH	1	41.78711, -73.3821	7/21-7/28/15
1700	N. tomentosus	MH	1	41.78711, -73.3821	7/21-7/28/15
1701	N. tomentosus	MH	1	41.78711, -73.3821	7/21-7/28/15
1702	N. tomentosus	MH	1	41.78711, -73.3821	7/21-7/28/15
1703	N. tomentosus	MH	1	41.78711, -73.3821	7/21-7/28/15
1704	N. tomentosus	MH	1	41.78711, -73.3821	7/21-7/28/15
1705	N. tomentosus	MH	1	41.78711, -73.3821	7/21-7/28/15
1706	N. tomentosus	MH	1	41.78711, -73.3821	7/21-7/28/15
1707	N. tomentosus	MH	1	41.78711, -73.3821	7/21-7/28/15
1708	N. tomentosus	MH	1	41.78711, -73.3821	7/21-7/28/15
1709	N. tomentosus	MH	1	41.78711, -73.3821	7/21-7/28/15
1710	N. tomentosus	MH	1	41.78711, -73.3821	7/21-7/28/15
1711	N. tomentosus	MH	1	41.78711, -73.3821	7/21-7/28/15
1712	N. tomentosus	MH	1	41.78711, -73.3821	7/21-7/28/15
1713	N. orbicollis	MH	2	41.78757, -73.38362	7/21-7/28/15
1714	N. orbicollis	MH	2	41.78757, -73.38362	7/21-7/28/15
1715	N. orbicollis	MH	2	41.78757, -73.38362	7/21-7/28/15
1716	N. orbicollis	MH	2	41.78757, -73.38362	7/21-7/28/15
1717	N. orbicollis	MH	2	41.78757, -73.38362	7/21-7/28/15
1718	N. orbicollis	MH	2	41.78757, -73.38362	7/21-7/28/15
1719	N. orbicollis	MH	2	41.78757, -73.38362	7/21-7/28/15
1720	N. orbicollis	MH	2	41.78757, -73.38362	7/21-7/28/15
1721	N. orbicollis	MH	2	41.78757, -73.38362	7/21-7/28/15
1722	N. orbicollis	MH	2	41.78757, -73.38362	7/21-7/28/15
1723	N. orbicollis	MH	2	41.78757, -73.38362	7/21-7/28/15
1724	N. orbicollis	MH	2	41.78757, -73.38362	7/21-7/28/15
1725	N. orbicollis	MH	2	41.78757, -73.38362	7/21-7/28/15
1726	N. tomentosus	MH	2	41.78757, -73.38362	7/21-7/28/15
1727	N. tomentosus	MH	2	41.78757, -73.38362	7/21-7/28/15
1728	N. tomentosus	MH	2	41.78757, -73.38362	7/21-7/28/15
1729	N. tomentosus	MH	2	41.78757, -73.38362	7/21-7/28/15
1730	N. tomentosus	MH	2	41.78757, -73.38362	7/21-7/28/15
1731	N. tomentosus	MH	2	41.78757, -73.38362	7/21-7/28/15
1732	N. tomentosus	MH	2	41.78757, -73.38362	7/21-7/28/15
1733	N. tomentosus	MH	2	41.78757, -73.38362	7/21-7/28/15
1734	N. tomentosus	MH	2	41.78757, -73.38362	7/21-7/28/15
1735	N. tomentosus	MH	2	41.78757, -73.38362	7/21-7/28/15
1736	N. tomentosus	MH	2	41.78757, -73.38362	7/21-7/28/15
1737	N. tomentosus	MH	2	41.78757, -73.38362	7/21-7/28/15
1738	N. tomentosus	MH	2	41.78757, -73.38362	7/21-7/28/15
1739	N. tomentosus	MH	2	41.78757, -73.38362	7/21-7/28/15
1740	N. tomentosus	MH	2	41.78757, -73.38362	7/21-7/28/15
1741	N. tomentosus	MH	2	41.78757, -73.38362	7/21-7/28/15
1742	N. tomentosus	MH	2	41.78757, -73.38362	7/21-7/28/15
1743	N. tomentosus	MH	2	41.78757, -73.38362	7/21-7/28/15
1744	N. tomentosus	MH	2	41.78757, -73.38362	7/21-7/28/15
1745	N. tomentosus	MH	2	41.78757, -73.38362	7/21-7/28/15
1746	N. tomentosus	MH	2	41.78757, -73.38362	7/21-7/28/15
1747	N. tomentosus	MH	2	41.78757, -73.38362	7/21-7/28/15
1748	N. tomentosus	MH	2	41.78757, -73.38362	7/21-7/28/15
1749	N. tomentosus	MH	2	41.78757, -73.38362	7/21-7/28/15
1750	N. tomentosus	MH	2	41.78757, -73.38362	7/21-7/28/15
1751	N. tomentosus	MH	2	41.78757, -73.38362	7/21-7/28/15
1752	N. tomentosus	MH	2	41.78757, -73.38362	7/21-7/28/15
1753	N. tomentosus	MH	2	41.78757, -73.38362	7/21-7/28/15
1754	N. tomentosus	MH	2	41.78757, -73.38362	7/21-7/28/15
1755	N. tomentosus	MH	2	41.78757, -73.38362	7/21-7/28/15
1756	N. tomentosus	MH	2	41.78757, -73.38362	7/21-7/28/15
1757	N. tomentosus	MH	2	41.78757, -73.38362	7/21-7/28/15
1758	N. tomentosus	MH	2	41.78757, -73.38362	7/21-7/28/15
1759	N. tomentosus	MH	2	41.78757, -73.38362	7/21-7/28/15
1760	N. tomentosus	MH	2	41.78757, -73.38362	7/21-7/28/15
1761	N. tomentosus	MH	2	41.78757, -73.38362	7/21-7/28/15
1762	N. tomentosus	MH	2	41.78757, -73.38362	7/21-7/28/15
1763	N. tomentosus	MH	2	41.78757, -73.38362	7/21-7/28/15
1764	N. tomentosus	MH	2	41.78757, -73.38362	7/21-7/28/15
1765	N. tomentosus	MH	2	41.78757, -73.38362	7/21-7/28/15
1766	N. tomentosus	MH	2	41.78757, -73.38362	7/21-7/28/15
1767	N. tomentosus	MH	2	41.78757, -73.38362	7/21-7/28/15
1768	N. tomentosus	MH	2	41.78757, -73.38362	7/21-7/28/15
1769	N. tomentosus	MH	2	41.78757, -73.38362	7/21-7/28/15
1770	N. tomentosus	MH	2	41.78757, -73.38362	7/21-7/28/15
1771	N. tomentosus	MH	2	41.78757, -73.38362	7/21-7/28/15
1772	N. tomentosus	MH	2	41.78757, -73.38362	7/21-7/28/15
1773	N. tomentosus	MH	2	41.78757, -73.38362	7/21-7/28/15
1774	N. tomentosus	MH	2	41.78757, -73.38362	7/21-7/28/15
1775	N. tomentosus	MH	2	41.78757, -73.38362	7/21-7/28/15
1776	N. tomentosus	MH	2	41.78757, -73.38362	7/21-7/28/15
1777	N. tomentosus	MH	2	41.78757, -73.38362	7/21-7/28/15
1778	N. tomentosus	MH	2	41.78757, -73.38362	7/21-7/28/15
1779	N. defodiens	MH	2	41.78757, -73.38362	7/21-7/28/15
1780	N. defodiens	MH	2	41.78757, -73.38362	7/21-7/28/15
1781	N. defodiens	MH	2	41.78757, -73.38362	7/21-7/28/15
1782	N. defodiens	MH	2	41.78757, -73.38362	7/21-7/28/15
1783	N. defodiens	MH	2	41.78757, -73.38362	7/21-7/28/15
1784	N. defodiens	MH	2	41.78757, -73.38362	7/21-7/28/15
1785	N. defodiens	MH	2	41.78757, -73.38362	7/21-7/28/15
1786	N. defodiens	MH	2	41.78757, -73.38362	7/21-7/28/15
1787	N. defodiens	MH	2	41.78757, -73.38362	7/21-7/28/15
1788	N. defodiens	MH	2	41.78757, -73.38362	7/21-7/28/15
1789	N. defodiens	MH	2	41.78757, -73.38362	7/21-7/28/15
1790	N. defodiens	MH	2	41.78757, -73.38362	7/21-7/28/15
1791	N. defodiens	MH	2	41.78757, -73.38362	7/21-7/28/15
1792	N. defodiens	MH	2	41.78757, -73.38362	7/21-7/28/15
1793	N. defodiens	MH	2	41.78757, -73.38362	7/21-7/28/15
1794	N. defodiens	MH	2	41.78757, -73.38362	7/21-7/28/15
1795	N. defodiens	MH	2	41.78757, -73.38362	7/21-7/28/15
1796	N. defodiens	MH	2	41.78757, -73.38362	7/21-7/28/15
1797	Necrophila americana	MH	2	41.78757, -73.38362	7/21-7/28/15
1798	N. orbicollis	MH	3	41.78835, -73.38337	7/21-7/28/15
1799	N. orbicollis	MH	3	41.78835, -73.38337	7/21-7/28/15
1800	N. orbicollis	MH	3	41.78835, -73.38337	7/21-7/28/15
1801	Necrophila americana	MH	3	41.78835, -73.38337	7/21-7/28/15
1802	Necrophila americana	MH	3	41.78835, -73.38337	7/21-7/28/15
1803	Necrophila americana	MH	3	41.78835, -73.38337	7/21-7/28/15
1804	O. noveboracense	MH	3	41.78835, -73.38337	7/21-7/28/15
1805	O. noveboracense	MH	3	41.78835, -73.38337	7/21-7/28/15
1806	O. noveboracense	MH	3	41.78835, -73.38337	7/21-7/28/15
1807	O. noveboracense	MH	3	41.78835, -73.38337	7/21-7/28/15
1808	N. tomentosus	MH	3	41.78835, -73.38337	7/21-7/28/15
1809	N. tomentosus	MH	3	41.78835, -73.38337	7/21-7/28/15
1810	N. tomentosus	MH	3	41.78835, -73.38337	7/21-7/28/15
1811	N. tomentosus	MH	3	41.78835, -73.38337	7/21-7/28/15
1812	N. tomentosus	MH	3	41.78835, -73.38337	7/21-7/28/15
1813	N. tomentosus	MH	3	41.78835, -73.38337	7/21-7/28/15
1814	N. tomentosus	MH	3	41.78835, -73.38337	7/21-7/28/15
1815	N. tomentosus	MH	3	41.78835, -73.38337	7/21-7/28/15
1816	N. tomentosus	MH	3	41.78835, -73.38337	7/21-7/28/15
1817	N. tomentosus	MH	3	41.78835, -73.38337	7/21-7/28/15
1818	N. tomentosus	MH	3	41.78835, -73.38337	7/21-7/28/15
1819	N. tomentosus	MH	3	41.78835, -73.38337	7/21-7/28/15
1820	N. tomentosus	MH	3	41.78835, -73.38337	7/21-7/28/15
1821	N. tomentosus	MH	3	41.78835, -73.38337	7/21-7/28/15
1822	N. tomentosus	MH	3	41.78835, -73.38337	7/21-7/28/15
1823	N. tomentosus	MH	3	41.78835, -73.38337	7/21-7/28/15
1824	N. tomentosus	MH	3	41.78835, -73.38337	7/21-7/28/15
1825	N. tomentosus	MH	3	41.78835, -73.38337	7/21-7/28/15
1826	N. tomentosus	MH	3	41.78835, -73.38337	7/21-7/28/15
1827	N. tomentosus	MH	3	41.78835, -73.38337	7/21-7/28/15
1828	N. tomentosus	MH	3	41.78835, -73.38337	7/21-7/28/15
1829	N. tomentosus	MH	3	41.78835, -73.38337	7/21-7/28/15
1830	N. tomentosus	MH	3	41.78835, -73.38337	7/21-7/28/15
1831	N. tomentosus	MH	3	41.78835, -73.38337	7/21-7/28/15
1832	N. tomentosus	MH	3	41.78835, -73.38337	7/21-7/28/15
1833	N. tomentosus	MH	3	41.78835, -73.38337	7/21-7/28/15
1834	N. tomentosus	MH	3	41.78835, -73.38337	7/21-7/28/15
1835	N. tomentosus	MH	3	41.78835, -73.38337	7/21-7/28/15
1836	N. tomentosus	MH	3	41.78835, -73.38337	7/21-7/28/15
1837	N. tomentosus	MH	3	41.78835, -73.38337	7/21-7/28/15
1838	N. tomentosus	MH	3	41.78835, -73.38337	7/21-7/28/15
1839	N. tomentosus	MH	3	41.78835, -73.38337	7/21-7/28/15
1840	N. tomentosus	MH	3	41.78835, -73.38337	7/21-7/28/15
1841	N. tomentosus	MH	3	41.78835, -73.38337	7/21-7/28/15
1842	N. tomentosus	MH	3	41.78835, -73.38337	7/21-7/28/15
1843	N. tomentosus	MH	3	41.78835, -73.38337	7/21-7/28/15
1844	N. tomentosus	MH	3	41.78835, -73.38337	7/21-7/28/15
1845	N. tomentosus	MH	3	41.78835, -73.38337	7/21-7/28/15
1846	N. tomentosus	MH	3	41.78835, -73.38337	7/21-7/28/15
1847	N. tomentosus	MH	3	41.78835, -73.38337	7/21-7/28/15
1848	N. tomentosus	MH	3	41.78835, -73.38337	7/21-7/28/15
1849	N. tomentosus	MH	3	41.78835, -73.38337	7/21-7/28/15
1850	N. tomentosus	MH	3	41.78835, -73.38337	7/21-7/28/15
1851	N. tomentosus	MH	3	41.78835, -73.38337	7/21-7/28/15
1852	N. tomentosus	MH	3	41.78835, -73.38337	7/21-7/28/15
1853	N. tomentosus	MH	3	41.78835, -73.38337	7/21-7/28/15
1854	N. tomentosus	MH	3	41.78835, -73.38337	7/21-7/28/15
1855	N. tomentosus	MH	3	41.78835, -73.38337	7/21-7/28/15
1856	N. tomentosus	MH	3	41.78835, -73.38337	7/21-7/28/15
1857	N. tomentosus	MH	3	41.78835, -73.38337	7/21-7/28/15
1858	N. tomentosus	MH	3	41.78835, -73.38337	7/21-7/28/15
1859	N. tomentosus	MH	3	41.78835, -73.38337	7/21-7/28/15
1860	N. tomentosus	MH	3	41.78835, -73.38337	7/21-7/28/15
1861	N. tomentosus	MH	3	41.78835, -73.38337	7/21-7/28/15
1862	N. tomentosus	MH	3	41.78835, -73.38337	7/21-7/28/15
1863	N. tomentosus	MH	3	41.78835, -73.38337	7/21-7/28/15
1864	N. tomentosus	MH	3	41.78835, -73.38337	7/21-7/28/15
1865	N. tomentosus	MH	3	41.78835, -73.38337	7/21-7/28/15
1866	N. tomentosus	MH	3	41.78835, -73.38337	7/21-7/28/15
1867	N. tomentosus	MH	3	41.78835, -73.38337	7/21-7/28/15
1868	N. tomentosus	MH	3	41.78835, -73.38337	7/21-7/28/15
1869	N. tomentosus	MH	3	41.78835, -73.38337	7/21-7/28/15
1870	N. tomentosus	MH	3	41.78835, -73.38337	7/21-7/28/15
1871	N. tomentosus	MH	3	41.78835, -73.38337	7/21-7/28/15
1872	N. tomentosus	MH	3	41.78835, -73.38337	7/21-7/28/15
1873	N. tomentosus	MH	3	41.78835, -73.38337	7/21-7/28/15
1874	N. tomentosus	MH	3	41.78835, -73.38337	7/21-7/28/15
1875	N. tomentosus	MH	3	41.78835, -73.38337	7/21-7/28/15
1876	N. tomentosus	MH	3	41.78835, -73.38337	7/21-7/28/15
1877	N. tomentosus	MH	3	41.78835, -73.38337	7/21-7/28/15
1878	N. tomentosus	MH	3	41.78835, -73.38337	7/21-7/28/15
1879	N. tomentosus	MH	3	41.78835, -73.38337	7/21-7/28/15
1880	N. tomentosus	MH	3	41.78835, -73.38337	7/21-7/28/15
1881	N. tomentosus	MH	3	41.78835, -73.38337	7/21-7/28/15
1882	N. tomentosus	MH	3	41.78835, -73.38337	7/21-7/28/15
1883	N. defodiens	MH	3	41.78835, -73.38337	7/21-7/28/15
1884	N. defodiens	MH	3	41.78835, -73.38337	7/21-7/28/15
1885	N. defodiens	MH	3	41.78835, -73.38337	7/21-7/28/15
1886	N. defodiens	MH	3	41.78835, -73.38337	7/21-7/28/15
1887	N. defodiens	MH	3	41.78835, -73.38337	7/21-7/28/15
1888	N. defodiens	MH	3	41.78835, -73.38337	7/21-7/28/15
1889	N. defodiens	MH	3	41.78835, -73.38337	7/21-7/28/15
1890	N. defodiens	MH	3	41.78835, -73.38337	7/21-7/28/15
1891	N. defodiens	MH	3	41.78835, -73.38337	7/21-7/28/15
1892	N. defodiens	MH	3	41.78835, -73.38337	7/21-7/28/15
1893	N. tomentosus	CFP	1	41.45319, -73.83885	7/22-7/29/15
1894	N. tomentosus	CFP	1	41.45319, -73.83885	7/22-7/29/15
1895	N. tomentosus	CFP	1	41.45319, -73.83885	7/22-7/29/15
1896	N. tomentosus	CFP	1	41.45319, -73.83885	7/22-7/29/15
1897	N. tomentosus	CFP	1	41.45319, -73.83885	7/22-7/29/15
1898	N. tomentosus	CFP	1	41.45319, -73.83885	7/22-7/29/15
1899	N. tomentosus	CFP	1	41.45319, -73.83885	7/22-7/29/15
1900	N. tomentosus	CFP	1	41.45319, -73.83885	7/22-7/29/15
1901	N. tomentosus	CFP	1	41.45319, -73.83885	7/22-7/29/15
1902	N. tomentosus	CFP	1	41.45319, -73.83885	7/22-7/29/15
1903	N. tomentosus	CFP	1	41.45319, -73.83885	7/22-7/29/15
1904	N. tomentosus	CFP	1	41.45319, -73.83885	7/22-7/29/15
1905	N. tomentosus	CFP	1	41.45319, -73.83885	7/22-7/29/15
1906	N. tomentosus	CFP	1	41.45319, -73.83885	7/22-7/29/15
1907	N. tomentosus	CFP	1	41.45319, -73.83885	7/22-7/29/15
1908	N. tomentosus	CFP	1	41.45319, -73.83885	7/22-7/29/15
1909	N. tomentosus	CFP	1	41.45319, -73.83885	7/22-7/29/15
1910	N. tomentosus	CFP	1	41.45319, -73.83885	7/22-7/29/15
1911	N. tomentosus	CFP	1	41.45319, -73.83885	7/22-7/29/15
1912	N. tomentosus	CFP	1	41.45319, -73.83885	7/22-7/29/15
1913	N. tomentosus	CFP	1	41.45319, -73.83885	7/22-7/29/15
1914	N. tomentosus	CFP	1	41.45319, -73.83885	7/22-7/29/15
1915	N. tomentosus	CFP	1	41.45319, -73.83885	7/22-7/29/15
1916	N. tomentosus	CFP	1	41.45319, -73.83885	7/22-7/29/15
1917	N. tomentosus	CFP	1	41.45319, -73.83885	7/22-7/29/15
1918	N. tomentosus	CFP	1	41.45319, -73.83885	7/22-7/29/15
1919	N. tomentosus	CFP	1	41.45319, -73.83885	7/22-7/29/15
1920	N. tomentosus	CFP	1	41.45319, -73.83885	7/22-7/29/15
1921	N. tomentosus	CFP	1	41.45319, -73.83885	7/22-7/29/15
1922	N. tomentosus	CFP	1	41.45319, -73.83885	7/22-7/29/15
1923	N. tomentosus	CFP	1	41.45319, -73.83885	7/22-7/29/15
1924	N. tomentosus	CFP	1	41.45319, -73.83885	7/22-7/29/15
1925	N. tomentosus	CFP	1	41.45319, -73.83885	7/22-7/29/15
1926	N. tomentosus	CFP	1	41.45319, -73.83885	7/22-7/29/15
1927	N. tomentosus	CFP	1	41.45319, -73.83885	7/22-7/29/15
1928	N. orbicollis	CFP	1	41.45319, -73.83885	7/22-7/29/15
1929	N. orbicollis	CFP	1	41.45319, -73.83885	7/22-7/29/15
1930	N. orbicollis	CFP	1	41.45319, -73.83885	7/22-7/29/15
1931	N. orbicollis	CFP	1	41.45319, -73.83885	7/22-7/29/15
1932	N. orbicollis	CFP	1	41.45319, -73.83885	7/22-7/29/15
1933	N. orbicollis	CFP	1	41.45319, -73.83885	7/22-7/29/15
1934	N. orbicollis	CFP	1	41.45319, -73.83885	7/22-7/29/15
1935	N. orbicollis	CFP	1	41.45319, -73.83885	7/22-7/29/15
1936	N. orbicollis	CFP	1	41.45319, -73.83885	7/22-7/29/15
1937	N. orbicollis	CFP	1	41.45319, -73.83885	7/22-7/29/15
1938	N. orbicollis	CFP	1	41.45319, -73.83885	7/22-7/29/15
1939	N. orbicollis	CFP	1	41.45319, -73.83885	7/22-7/29/15
1940	N. orbicollis	CFP	1	41.45319, -73.83885	7/22-7/29/15
1941	N. orbicollis	CFP	1	41.45319, -73.83885	7/22-7/29/15
1942	N. orbicollis	CFP	1	41.45319, -73.83885	7/22-7/29/15
1943	N. orbicollis	CFP	1	41.45319, -73.83885	7/22-7/29/15
1944	N. orbicollis	CFP	1	41.45319, -73.83885	7/22-7/29/15
1945	N. orbicollis	CFP	1	41.45319, -73.83885	7/22-7/29/15
1946	N. orbicollis	CFP	1	41.45319, -73.83885	7/22-7/29/15
1947	N. orbicollis	CFP	1	41.45319, -73.83885	7/22-7/29/15
1948	N. orbicollis	CFP	1	41.45319, -73.83885	7/22-7/29/15
1949	N. orbicollis	CFP	1	41.45319, -73.83885	7/22-7/29/15
1950	Necrophila americana	CFP	1	41.45319, -73.83885	7/22-7/29/15
1951	Necrophila americana	CFP	1	41.45319, -73.83885	7/22-7/29/15
1952	Necrophila americana	CFP	1	41.45319, -73.83885	7/22-7/29/15
1953	Necrophila americana	CFP	1	41.45319, -73.83885	7/22-7/29/15
1954	Necrophila americana	CFP	1	41.45319, -73.83885	7/22-7/29/15
1955	Necrophila americana	CFP	1	41.45319, -73.83885	7/22-7/29/15
1956	Necrophila americana	CFP	1	41.45319, -73.83885	7/22-7/29/15
1957	Necrophila americana	CFP	1	41.45319, -73.83885	7/22-7/29/15
1958	Necrophila americana	CFP	1	41.45319, -73.83885	7/22-7/29/15
1959	N. sayi	CFP	1	41.45319, -73.83885	7/22-7/29/15
1960	N. sayi	CFP	1	41.45319, -73.83885	7/22-7/29/15
1961	N. sayi	CFP	1	41.45319, -73.83885	7/22-7/29/15
1962	O. noveboracense	CFP	1	41.45319, -73.83885	7/22-7/29/15
1963	O. noveboracense	CFP	1	41.45319, -73.83885	7/22-7/29/15
1964	N. tomentosus	CFP	2	41.45472, -73.84058	7/22-7/29/15
1965	N. tomentosus	CFP	2	41.45472, -73.84058	7/22-7/29/15
1966	N. tomentosus	CFP	2	41.45472, -73.84058	7/22-7/29/15
1967	N. tomentosus	CFP	2	41.45472, -73.84058	7/22-7/29/15
1968	N. tomentosus	CFP	2	41.45472, -73.84058	7/22-7/29/15
1969	N. tomentosus	CFP	2	41.45472, -73.84058	7/22-7/29/15
1970	N. tomentosus	CFP	2	41.45472, -73.84058	7/22-7/29/15
1971	N. tomentosus	CFP	2	41.45472, -73.84058	7/22-7/29/15
1972	N. tomentosus	CFP	2	41.45472, -73.84058	7/22-7/29/15
1973	N. tomentosus	CFP	2	41.45472, -73.84058	7/22-7/29/15
1974	N. tomentosus	CFP	2	41.45472, -73.84058	7/22-7/29/15
1975	N. tomentosus	CFP	2	41.45472, -73.84058	7/22-7/29/15
1976	N. tomentosus	CFP	2	41.45472, -73.84058	7/22-7/29/15
1977	N. tomentosus	CFP	2	41.45472, -73.84058	7/22-7/29/15
1978	N. tomentosus	CFP	2	41.45472, -73.84058	7/22-7/29/15
1979	N. tomentosus	CFP	2	41.45472, -73.84058	7/22-7/29/15
1980	N. tomentosus	CFP	2	41.45472, -73.84058	7/22-7/29/15
1981	N. tomentosus	CFP	2	41.45472, -73.84058	7/22-7/29/15
1982	N. tomentosus	CFP	2	41.45472, -73.84058	7/22-7/29/15
1983	N. tomentosus	CFP	2	41.45472, -73.84058	7/22-7/29/15
1984	N. tomentosus	CFP	2	41.45472, -73.84058	7/22-7/29/15
1985	N. tomentosus	CFP	2	41.45472, -73.84058	7/22-7/29/15
1986	N. tomentosus	CFP	2	41.45472, -73.84058	7/22-7/29/15
1987	N. tomentosus	CFP	2	41.45472, -73.84058	7/22-7/29/15
1988	N. tomentosus	CFP	2	41.45472, -73.84058	7/22-7/29/15
1989	N. tomentosus	CFP	2	41.45472, -73.84058	7/22-7/29/15
1990	N. tomentosus	CFP	2	41.45472, -73.84058	7/22-7/29/15
1991	N. tomentosus	CFP	2	41.45472, -73.84058	7/22-7/29/15
1992	N. tomentosus	CFP	2	41.45472, -73.84058	7/22-7/29/15
1993	N. tomentosus	CFP	2	41.45472, -73.84058	7/22-7/29/15
1994	N. tomentosus	CFP	2	41.45472, -73.84058	7/22-7/29/15
1995	N. tomentosus	CFP	2	41.45472, -73.84058	7/22-7/29/15
1996	N. tomentosus	CFP	2	41.45472, -73.84058	7/22-7/29/15
1997	N. tomentosus	CFP	2	41.45472, -73.84058	7/22-7/29/15
1998	N. tomentosus	CFP	2	41.45472, -73.84058	7/22-7/29/15
1999	N. tomentosus	CFP	2	41.45472, -73.84058	7/22-7/29/15
2000	N. tomentosus	CFP	2	41.45472, -73.84058	7/22-7/29/15
2001	N. tomentosus	CFP	2	41.45472, -73.84058	7/22-7/29/15
2002	N. tomentosus	CFP	2	41.45472, -73.84058	7/22-7/29/15
2003	N. tomentosus	CFP	2	41.45472, -73.84058	7/22-7/29/15
2004	N. tomentosus	CFP	2	41.45472, -73.84058	7/22-7/29/15
2005	N. tomentosus	CFP	2	41.45472, -73.84058	7/22-7/29/15
2006	N. tomentosus	CFP	2	41.45472, -73.84058	7/22-7/29/15
2007	N. tomentosus	CFP	2	41.45472, -73.84058	7/22-7/29/15
2008	N. tomentosus	CFP	2	41.45472, -73.84058	7/22-7/29/15
2009	N. tomentosus	CFP	2	41.45472, -73.84058	7/22-7/29/15
2010	N. tomentosus	CFP	2	41.45472, -73.84058	7/22-7/29/15
2011	N. tomentosus	CFP	2	41.45472, -73.84058	7/22-7/29/15
2012	N. tomentosus	CFP	2	41.45472, -73.84058	7/22-7/29/15
2013	N. tomentosus	CFP	2	41.45472, -73.84058	7/22-7/29/15
[truncated: 440 more rows]
