# Supplementary material for: Urban forests sustain diverse carrion beetle assemblages in the New York City metropolitan area
Source: PeerJ journal article supplement (doi:10.7717/peerj.3088), 2017-03-15

**Figure S1.** Relationship between carrion beetle (A) species richness and (B) species diversity (1/D) with percent forest area at all sampled sites (site abbreviations found in Table 1, Figure 1).

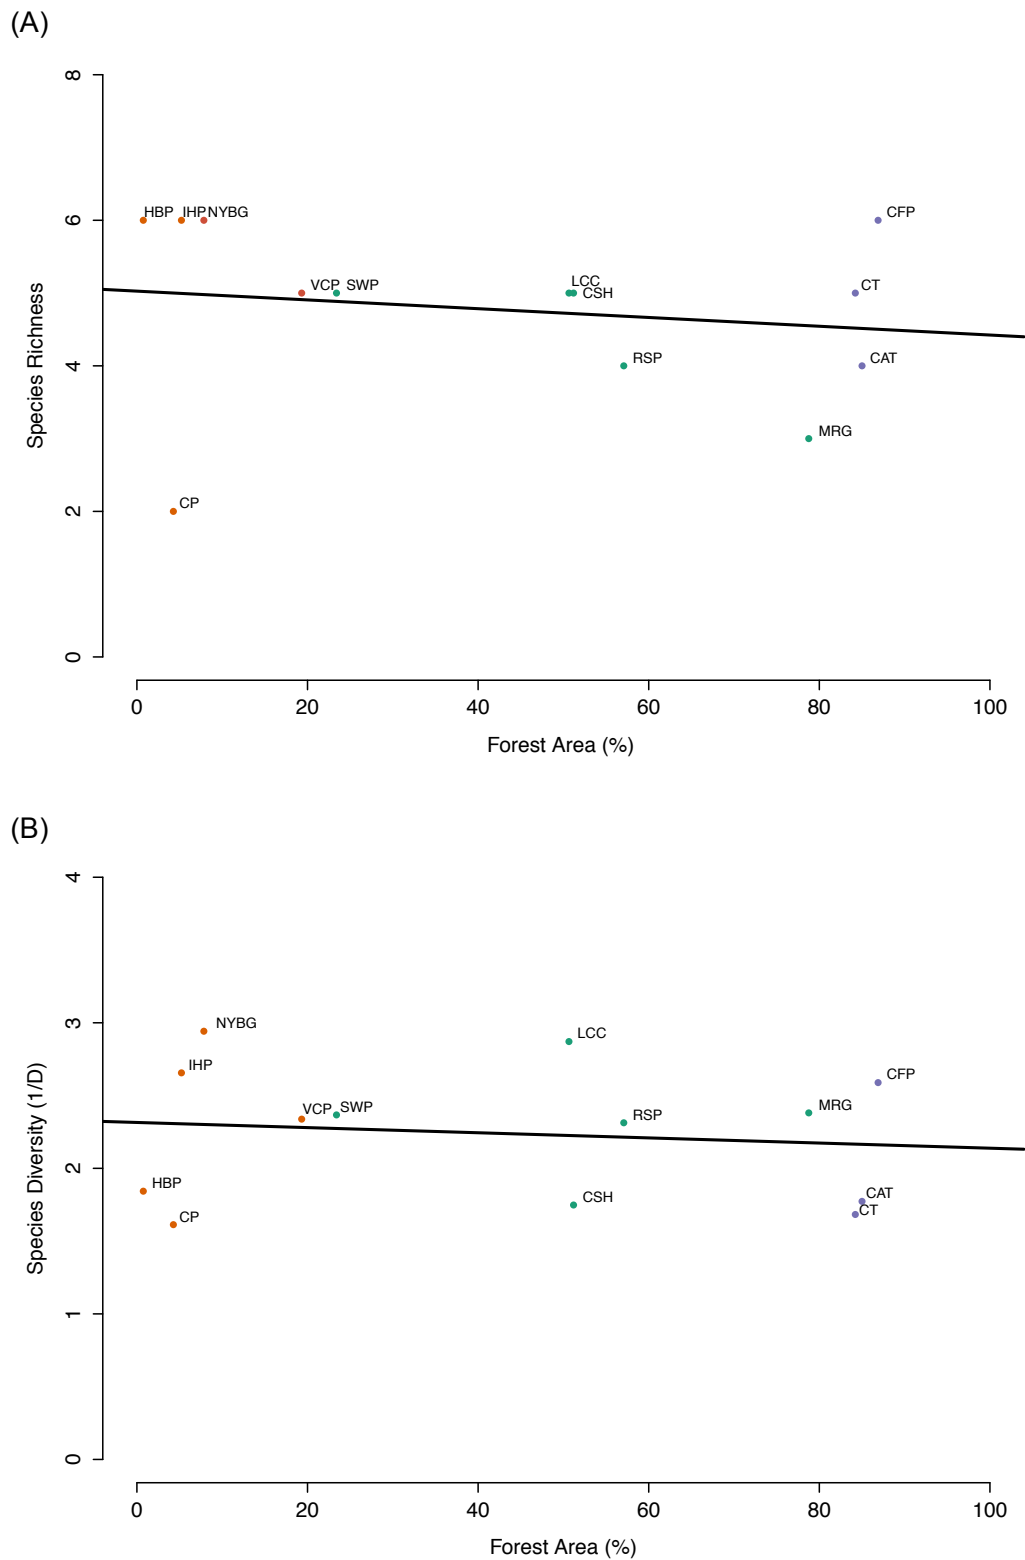

Supplement: Supplemental_Figure_S1.pdf [file Supplemental_Figure_S1.pdf]
